# Supplementary material
Source: publisher figshare collection journal article supplement (https://karger.figshare.com/articles/dataset/_/5120386)
Supplement: Supplementary file 1 [file 1]

Supplementary Material 3. Changes in taxonomic nomenclature of New World parrot species, as given by the nomenclature currently suggested by the American Ornithologists' Union.

| Corrected Taxonomic name                 | Original Taxonomic name (Reference or Museum)                                                                                          |
|------------------------------------------|----------------------------------------------------------------------------------------------------------------------------------------|
| <i>Amazona aestiva</i>                   | <i>Chrysotis aestiva</i>                                                                                                               |
| <i>Amazona agilis</i>                    | <i>Chrysotis agilis</i>                                                                                                                |
| <i>Amazona albifrons</i>                 | <i>Chrysotis albifrons</i>                                                                                                             |
| <i>Amazona amazonica</i>                 | <i>Chrysotis amazonica</i>                                                                                                             |
| <i>Amazona autumnalis</i>                | <i>Amazona salvini</i> , <i>Chrysotis autumnalis</i> , <i>Chrysotis salvini</i>                                                        |
| <i>Amazona brasiliensis</i>              | <i>Chrysotis brasiliensis</i>                                                                                                          |
| <i>Amazona collaria</i>                  | <i>Chrysotis collaria</i>                                                                                                              |
| <i>Amazona dufresniana</i>               | <i>Chrysotis dufresniana</i>                                                                                                           |
| <i>Amazona farinosa</i>                  | <i>Chrysotis farinosa</i> , <i>Chrysotis guatemalae</i>                                                                                |
| <i>Amazona farinosa inornata</i>         | <i>Amazona inornata</i>                                                                                                                |
| <i>Amazona farinosa virenticeps</i>      | <i>Amazona virenticeps</i>                                                                                                             |
| <i>Amazona festiva</i>                   | <i>Chrysotis festiva</i>                                                                                                               |
| <i>Amazona finschi</i>                   | <i>Chrysotis finschi</i>                                                                                                               |
| <i>Amazona ochrocephala</i>              | <i>Chrysotis auropalliata</i> , <i>Chrysotis levaillantii</i> , <i>Chrysotis ochrocephala</i>                                          |
| <i>Amazona ochrocephala auropalliata</i> | <i>Amazona auropalliata</i> <i>Amazona oratrix auropalliata</i>                                                                        |
| <i>Amazona ochrocephala belizensis</i>   | <i>Amazona oratrix belizensis</i>                                                                                                      |
| <i>Amazona ochrocephala caribaea</i>     | <i>Amazona oratrix caribaea</i>                                                                                                        |
| <i>Amazona ochrocephala nattereri</i>    | <i>Amazona nattereri</i>                                                                                                               |
| <i>Amazona ochrocephala oratrix</i>      | <i>Amazona oratrix</i> , <i>Amazona oratrix hondurensis</i>                                                                            |
| <i>Amazona ochrocephala parvipes</i>     | <i>Amazona oratrix parvipes</i>                                                                                                        |
| <i>Amazona ochrocephala tresmariae</i>   | <i>Amazona oratrix tresmariae</i>                                                                                                      |
| <i>Amazona pretrei</i>                   | <i>Chrysotis pretrei</i>                                                                                                               |
| <i>Amazona rhodocorytha</i>              | <i>Amazona brasiliensis rhodocorytha</i> , <i>A. dufresniana rhodocorytha</i>                                                          |
| <i>Amazona tucumana</i>                  | <i>Chrysotis tucumana</i>                                                                                                              |
| <i>Amazona vinacea</i>                   | <i>Chrysotis vinacea</i>                                                                                                               |
| <i>Amazona viridigenalis</i>             | <i>Chrysotis viridigena</i>                                                                                                            |
| <i>Amazona xantholara</i>                | <i>Chrysotis xantholara</i>                                                                                                            |
| <i>Ara ambiguus</i>                      | <i>Ara ambigua</i> <i>Aratinga ambigua</i>                                                                                             |
| <i>Ara chloropterus</i>                  | <i>Ara chloroptera</i>                                                                                                                 |
| <i>Ara severus</i>                       | <i>Ara severa</i>                                                                                                                      |
| <i>Aratinga acuticaudata</i>             | <i>Conurus acuticaudata</i> , <i>Thectocercus acuticaudata</i>                                                                         |
| <i>Aratinga acuticaudata haemorrhous</i> | <i>Psittacara acuticaudata</i> , <i>haemorrhous</i>                                                                                    |
| <i>Aratinga acuticaudata neoxena</i>     | <i>Aratinga haemorrhous neoxena</i>                                                                                                    |
| <i>Aratinga aurea</i>                    | <i>Conurus aureus</i>                                                                                                                  |
| <i>Aratinga auricapilla</i>              | <i>Aratinga auricapillus</i> , <i>A. solstitialis auricapilla</i> <i>Conurus auricapillus</i>                                          |
| <i>Aratinga auricapilla aurifrons</i>    | <i>Aratinga solstitialis aurifrons</i>                                                                                                 |
| <i>Aratinga brevipes</i>                 | <i>Aratinga holochlora brevipes</i>                                                                                                    |
| <i>Aratinga canicularis</i>              | <i>Conurus canicularis</i> , <i>Conurus petzii</i>                                                                                     |
| <i>Aratinga chloropterus</i>             | <i>Aratinga chloroptera</i> , <i>Conurus chloropterus</i>                                                                              |
| <i>Aratinga erythrogastrus</i>           | <i>Aratinga rubrolarvata</i>                                                                                                           |
| <i>Aratinga euops</i>                    | <i>Amazona euops</i>                                                                                                                   |
| <i>Aratinga finschi</i>                  | <i>Conurus finschi</i>                                                                                                                 |
| <i>Aratinga holochlora rubritorquis</i>  | <i>Aratinga rubritorquis</i>                                                                                                           |
| <i>Aratinga holochlora strenua</i>       | <i>Aratinga strenua</i>                                                                                                                |
| <i>Aratinga jandaya</i>                  | <i>Aratinga solstitialis jandaya</i>                                                                                                   |
| <i>Aratinga leucophthalma</i>            | <i>Conurus leucophthalmus</i> , <i>Psittacara leucophthalmus</i>                                                                       |
| <i>Aratinga leucophthalma callogenis</i> | <i>Ara leucophthalmus callogenis</i> , <i>A. callogenis</i> , <i>Conurus callogenis</i>                                                |
| <i>Aratinga nana astec</i>               | <i>Amazona astec astec</i> , <i>Aratinga astec</i> , <i>Conurus aztec</i>                                                              |
| <i>Aratinga pertinax aeruginosa</i>      | <i>Ara aeruginosa aeruginosa</i>                                                                                                       |
| <i>Aratinga pertinax chrysophrys</i>     | <i>Eupsittula pertinax chrysophrys</i>                                                                                                 |
| <i>Aratinga solstitialis</i>             | <i>Conurus solstitialis</i>                                                                                                            |
| <i>Aratinga wagleri</i>                  | <i>Aratinga wagleri</i>                                                                                                                |
| <i>Aratinga weddellii</i>                | <i>Ara weddellii</i> , <i>Conurus weddellii</i>                                                                                        |
| <i>Bolborhynchus orbygniesius</i>        | <i>Bolborhynchus andicola</i> , <i>B. aurifrons orbygniesius</i> , <i>Psilopsiagon aurifrons orbygniesius</i> , <i>P. orbygniesius</i> |
| <i>Brotogeris chiriri</i>                | <i>Brotogeris versicolorus chiriri</i> , <i>Tirica chiriri</i> , <i>Tirica versicolorus chiriri</i>                                    |
| <i>Brotogeris chrysoptera</i>            | <i>Brotogeris chrysopterus</i> , <i>Brotogeris chrysosoma</i> , <i>Brotogeris tuipara</i>                                              |
| <i>Brotogeris cyanoptera</i>             | <i>Brotogeris devillei</i> , <i>Brotogeris jugularis cyanoptera</i>                                                                    |
| <i>Brotogeris cyanoptera gustavi</i>     | <i>Brotogeris gustavi beniensis</i> , <i>Brotogeris gustavi gustavi</i>                                                                |
| <i>Brotogeris jugularis</i>              | <i>Brotogeris tovi</i>                                                                                                                 |
| <i>Brotogeris tirica</i>                 | <i>Brotogeris viridissimu</i> , <i>Tirica tirica</i>                                                                                   |
| <i>Brotogeris versicolorus</i>           | <i>Tirica virescens</i>                                                                                                                |
| <i>Diopsittaca nobilis</i>               | <i>Ara hahni</i> , <i>Ara nobilis</i> , <i>Diopsittaca hahni</i>                                                                       |
| <i>Diopsittaca nobilis cumanensis</i>    | <i>Ara nobilis cumanensis</i>                                                                                                          |
| <i>Diopsittaca nobilis longipennis</i>   | <i>Ara nobilis longipennis</i>                                                                                                         |
| <i>Enicognathus ferrugineus</i>          | <i>Enicognathus ferruginea</i> , <i>Microsittace ferruginea</i>                                                                        |
| <i>Forpus coelestis</i>                  | <i>Psittacula coelestis</i>                                                                                                            |

Supplementary Material 3 (cont). Changes in taxonomic nomenclature of New World parrot species, as given by the nomenclature currently suggested by the American Ornithologists' Union.

| Corrected Taxonomic name                    | Original Taxonomic name (Reference or Museum)                                             |
|---------------------------------------------|-------------------------------------------------------------------------------------------|
| <i>Forpus conspicillatus</i>                | <i>Psittacula conspicillata</i>                                                           |
| <i>Forpus cyanopygius</i>                   | <i>Psittacula cyanopygia</i>                                                              |
| <i>Forpus passerinus deliciosus</i>         | <i>Psittacula deliciosa</i>                                                               |
| <i>Forpus passerinus passerinus</i>         | <i>Psittacula passerina passerina</i>                                                     |
| <i>Forpus sclateri</i>                      | <i>Forpus modestus, Psittacula modesta Psittacula sclateri</i>                            |
| <i>Forpus xanthops</i>                      | <i>Forpus coelestis xanthops</i>                                                          |
| <i>Forpus xanthopterygius</i>               | <i>Forpus crassirostris, Forpus passerinus vividus, Psittacula vivida vivida</i>          |
| <i>Forpus xanthopterygius crassirostris</i> | <i>Forpus crassirostris, F. crassirostris vividus, Psittacula passerina crassirostris</i> |
| <i>Forpus xanthopterygius flavissimus</i>   | <i>Forpus xanthopterygius flavissima</i>                                                  |
| <i>Forpus xanthopterygius spengeli</i>      | <i>Forpus spengeli</i>                                                                    |
| <i>Guarouba guarouba</i>                    | <i>Aratinga guarouba, Conurus guarouba</i>                                                |
| <i>Gypopsitta barrabandi</i>                | <i>Eucinetus barrabandi</i>                                                               |
| <i>Gypopsitta caica</i>                     | <i>Eucinetus caica</i>                                                                    |
| <i>Gypopsitta haematotis</i>                | <i>Eucinetus haematoids, Pionopsittacus haematodis, Pyrilia haematodis haematodis</i>     |
| <i>Gypopsitta pulchra</i>                   | <i>Eucinetus pulchra</i>                                                                  |
| <i>Gypopsitta pyrilia</i>                   | <i>Pionopsittacus pyrili, Pyrilia pyrilia</i>                                             |
| <i>Hapalopsittaca fueresi</i>               | <i>Hapalopsittaca amazonina fueresi</i>                                                   |
| <i>Hapalopsittaca pyrrhops</i>              | <i>Hapalopsittaca amazonina pyrrhops</i>                                                  |
| <i>Myiopsitta monachus</i>                  | <i>Bolborhynchus monachus</i>                                                             |
| <i>Nandayus nenday</i>                      | <i>Aratinga nenday</i>                                                                    |
| <i>Orthopsittaca manilata</i>               | <i>Ara manilata, Diopsittaca manilata</i>                                                 |
| <i>Pionites leucogaster xanthomerus</i>     | <i>Pionites leucogaster xanthurius</i>                                                    |
| <i>Pionites melanocephalus</i>              | <i>Caica melanocephala, Pionites melanocephala</i>                                        |
| <i>Pionopsitta pileata</i>                  | <i>Pionopsittacus pileatus</i>                                                            |
| <i>Pionus sordidus corallinus</i>           | <i>Pionus corallinus corallinus, Pionus corallinus mindoensis</i>                         |
| <i>Primolius auricollis</i>                 | <i>Ara auricollis, Propyrrhura auricollis</i>                                             |
| <i>Primolius couloui</i>                    | <i>Ara couloui, Propyrrhura couloui</i>                                                   |
| <i>Primolius maracana</i>                   | <i>Ara maracana, Propyrrhura maracana</i>                                                 |
| <i>Psilopsiagon aurifrons</i>               | <i>Bolborhynchus aurifrons, Bolborhynchus aurifrons aurifrons</i>                         |
| <i>Psilopsiagon aurifrons margaritae</i>    | <i>Bolborhynchus aurifrons margaritae</i>                                                 |
| <i>Psilopsiagon aurifrons robertsi</i>      | <i>Bolborhynchus aurifrons robertsi</i>                                                   |
| <i>Psilopsiagon aurifrons rubrirostris</i>  | <i>Bolborhynchus aurifrons rubrirostris, Bolborhynchus rubrirostris</i>                   |
| <i>Psilopsiagon aymara</i>                  | <i>Amoropsittaca aymara, Bolborhynchus aymara</i>                                         |
| <i>Pyrrhura devillei</i>                    | <i>Pyrrhura frontalis devillei</i>                                                        |
| <i>Pyrrhura emma</i>                        | <i>Pyrrhura leucotis auricularis</i>                                                      |
| <i>Pyrrhura frontalis</i>                   | <i>Pyrrhura borelli, Pyrrhura vittata</i>                                                 |
| <i>Pyrrhura griseipectus</i>                | <i>Aratinga pertinax griseipecta, Pyrrhura anaca, P. leucotis griseipectus</i>            |
| <i>Pyrrhura lepida</i>                      | <i>Pyrrhura perlata lepida</i>                                                            |
| <i>Pyrrhura lepida anerythra</i>            | <i>Pyrrhura perlata anerythra</i>                                                         |
| <i>Pyrrhura lepida coerulescens</i>         | <i>Pyrrhura perlata coerulescens</i>                                                      |
| <i>Pyrrhura melanura chapmani</i>           | <i>Pyrrhura chapmani</i>                                                                  |
| <i>Pyrrhura melanura souancei</i>           | <i>Pyrrhura soaunnei</i>                                                                  |
| <i>Pyrrhura molinae</i>                     | <i>Pyrrhura hypoxantha</i>                                                                |
| <i>Pyrrhura perlata</i>                     | <i>Pyrrhura rhodogaster</i>                                                               |
| <i>Pyrrhura pfrimeri</i>                    | <i>Pyrrhura leucotis pfrimeri</i>                                                         |
| <i>Pyrrhura picta caeruleiceps</i>          | <i>Pyrrhura caeruleiceps</i>                                                              |
| <i>Pyrrhura picta roseifrons</i>            | <i>Pyrrhura roseifrons</i>                                                                |
| <i>Pyrrhura picta subandina</i>             | <i>Pyrrhura subandina</i>                                                                 |
| <i>Rhynchopsitta pachyrhyncha</i>           | <i>Rhynchopsitta niger</i>                                                                |
| <i>Rhynchopsitta pachyrhyncha terrisi</i>   | <i>Rhynchopsitta terrisi</i>                                                              |
| <i>Touit batavicus</i>                      | <i>Touit batavica, Urochroma cingulata</i>                                                |
| <i>Touit dilectissimus</i>                  | <i>Touit dilectissima Urochroma dilectissima</i>                                          |
| <i>Touit dilectissimus costaricensis</i>    | <i>Touit costaricensis</i>                                                                |
| <i>Touit huetii</i>                         | <i>Urochroma hueti</i>                                                                    |
| <i>Touit melanonotus</i>                    | <i>Touit melanonota, Urochroma wiedi</i>                                                  |
| <i>Touit purpuratus</i>                     | <i>Touit purpurata, Urochroma purpurata</i>                                               |
| <i>Touit stictopterus</i>                   | <i>Touit stictoptera</i>                                                                  |
| <i>Touit surdus</i>                         | <i>Touit surda, Urochroma surda</i>                                                       |
| <i>Triclaria malachitacea</i>               | <i>Triclaria cyanogaster</i>                                                              |
