# Supplementary material
Source: publisher figshare collection journal article supplement (https://karger.figshare.com/articles/dataset/_/5120386)
Supplement: Supplementary file 3 [file 1]

## Supplementary Material 2. Bibliographic references (A) and museum collections (B) contributing with locality records of New World parrot species.

### (A) Bibliographic references

1. Accordi IA (2001). Avifauna de tres sitios contiguos na zona urbana do municipio de Canoas, RS. *Acta Biologica Leopoldensia* 23: 59-68.
2. Accordi IA (2003). Levantamento e análise da conservação da avifauna na sub-bacia do baixo Jacuí, Rio Grande do Sul, Brasil. *Atualidades Ornitológicas* 114: 7-22.
3. Acosta M, Mugica L, Torres O, Denis D, Jimenez A, Rodriguez A (2002). Current status of Cuban threatened birds: case studies and conservation programs. *Journal of Caribbean Ornithology Special Issue*: 52.
4. Aguilar HF (1995). Nuevas extensiones de registros para algunas aves de Venezuela. *Revista de Ecología Latino Americana* 4: 15-18.
5. Aguirre AC, Aldrich AD (1983) Catálogo das Aves do Museu da Fauna. Instituto Brasileiro de Desenvolvimento Florestal: Rio de Janeiro.
6. Alabarce EA, Antelo CM (2000). Estudio preliminar de la avifauna residente en primavera en un sector del Bosque Chaqueño (Tucuman, Argentina). *Acta Zoologica Lilloana* 45: 181-188.
7. Alabarce EA, Laredo C, Lucero M, Vides R (1990). Análisis de la estructura de una comunidad de Aves en la localidad de Las Juntas, provincia de Catamarca. Estudio preliminar. *Acta Zoologica Lilloana* 39: 45-52.
8. Albertani F, Martuscelli P, Yamashita C, Otto P, Wajntal A (2000). Genetic variability estimates in the Marajó Yellow-crowned Amazon (*Amazona ochrocephala xantholaema*) (Psittacidae). *Ornitologia Neotropical* 11: 307-314.
9. Albuquerque JLB (1996). A avifauna do parque estadual da serra do Tabuleiro, Santa Catarina, Brasil e as implicações para sua conservação. *Acta Biologica Leopoldensia* 18: 47-68.
10. Aleixo A (1999). Effects of selective logging on a bird community in the Atlantic rain forest. *Condor* 101: 537-548.
11. Aleixo A, Vielliard JME (1995). Composição e dinâmica da avifauna da Mata de Santa Genebra, Campinas, São Paulo, Brasil. *Revista Brasileira de Zoologia* 12: 493-511.
12. Almeida MEC, Vielliard JME, Dias MM (1999). Composição da avifauna em duas matas ciliares na bacia do rio Jacaré-Pepira, São Paulo, Brasil. *Revista Brasileira de Zoologia* 16: 1087-1098.
13. Alonso HG (2001). Conductas de gregarismo y vocalización de la cotorra cubana (*Amazona leucocephala*). *Ornitologia Neotropical* 12: 141-152.
14. Anderson DL, Wiedenfeld DA, Bechard MJ, Novak SJ (2004). Avian diversity in the Moskitia region of Honduras. *Ornitologia Neotropical* 15: 447-482.
15. Antas PTZ (1995) Aves do Parque Nacional de Brasília. Instituto Brasileiro do Meio Ambiente e Recursos Naturais Renováveis (IBAMA): Brasília, D.F..
16. Aramburu RM (1998). Supervivencia de pichones de cotorra común *Myiopsitta monachus monachus* (Aves: Psittacidae) en una población silvestre. *Ornitologia Neotropical* 9: 95-98.
17. Argel de Oliveira MM (1995). Aves e vegetação em um bairro residencial da cidade de São Paulo (São Paulo, Brasil). *Revista Brasileira de Zoologia* 12: 81-92.
18. Attil R (1981). The status and conservation of the Bahamas Amazon (*Amazona leucocephala bahamensis*). In: Conservation of New World Parrots. Proceedings of the ICBP Parrot Working Group, St. Lucia, 1980. (Pasquier, RF, ed.) pp. 81. Smithsonian Institution Press: Washington.
19. Austin OLJ (1929). Birds of the Cayo District, British Honduras. *Bulletin of the Museum of Comparative Zoology* 69: 363-395.
20. Avanzo VC, Sanfilippo LF (2000). Levantamento preliminar da avifauna de Ilha Comprida, São Paulo. *Boletim CEO* 14: 10-14.
21. Ayuso JG, Arambiza-Segundo A (2001) Lista preliminar de las aves del P.N.Kaa-ya del Gran Chaco e Izozog. Sociedad para la Conservación de la Vida Silvestre - Capitanía del Alto y Bajo Izozog: Santa Cruz.
22. Azevedo TR (1995). Estudo da avifauna do campus da Universidade Federal de Santa Catarina (Florianópolis). *Biotemas* 8: 7-35.
23. Bangs O, Penard TE (1918). Notes on a collection of Surinam birds. *Bulletin of the Museum of Comparative Zoology* 63: 25-93.
24. Banos JCB, Lopez-Mata L (2001). Abundancia y distribución temporal de aves en una selva mediana subperennifolia en el centro de Veracruz, Mexico. *Anales del Instituto de Biología Universidad Nacional Autónoma de México Serie Zoología* 72: 259-283.
25. Banos JCB, López-Mata L (2005). Riqueza y diversidad de especies de aves en una selva mediana subperennifolia en el centro de Veracruz, México. *Acta Zoológica Mexicana* 21: 1-20.
26. Barnes R, Butchart SHM, Davies CWN, Fernandez M, Seddon N (1997). New distributional information on eight bird species from northern Peru. *Bulletin of the British Ornithologists' Club* 117: 69-74.
27. Barros YM, Marcondes-Machado LO (2000). Comportamento alimentar do periquito-da-caatinga *Aratinga cactorum* em Curaca, Bahia. *Ararajuba* 8: 55-59.
28. Bates JM, Parker III TA (1998). The avifauna of Parque Nacional Noel Kempff Mercado and surrounding areas. *RAP Working Papers* 10: 317-340.
29. Becker CD, López-Lánus B (1999). Conservation value of a Guarua forest in the dry season: a bird survey in Reserva Ecológica de Loma Alta, Ecuador. *Cotinga* 8: 66-69.

30. Begazo AJ (1996). Ecology and conservation of the Yellow-faced Parrotlet *Forpus xanthops*. Cotinga 6: 20-23.
31. Begazo AJ, Valqui T, Sokol M, Langlois E (2001). Notes on some birds from central and northern Peru. Cotinga 15: 81-87.
32. Beissinger SR, Waltman JR (1991). Extraordinary clutch size and hatching asynchrony of a neotropical parrot. Auk 108: 863-867.
33. Belton W (1994) Aves do Rio Grande do Sul. Unisinos: Porto Alegre.
34. Bencke G (1996). Annotated list of birds of Monte Alverne, Central Rio Grande do Sul, Brazil. Acta Biologica Leopoldensia 18: 17-42.
35. Bencke GA, Kindel A (1999). Bird counts along an altitudinal gradient of Atlantic forest in northeastern Rio Grande do Sul, Brazil. Ararajuba 7: 91-107.
36. Berla HF (1944). Lista das aves colecionadas em Pedra Branca, Município de Parati, estado do Rio de Janeiro, com algumas notas sobre sua biologia. Boletim do Museu Nacional 18: 1-11.
37. Berla HF (1946). Lista das espécies colecionadas em Pernambuco, com descrição de uma espécie nova, de um halotipo e notas de campo. Boletim do Museu Nacional 65: 1-17.
38. Best BJ, Clarke CT, Checker M, Broom ML, Thewlis RM, Duckworth W, McNab A (1993). Distributional records, natural history notes and conservation of some poorly known birds from southwestern Ecuador and northwestern Peru. Bulletin of the British Ornithologists' Club 113: 108-119.
39. Bianchi CA, Bagno MA, Juarez KM (2000). Predation of *Ara ararauna* and *Amazona aestiva* (Psittaciformes, Psittacidae) by *Chrysocyon brachyurus* (Carnivora, Canidae) in the Cerrado, Brazil. Ararajuba 8: 49-50.
40. Binford LC (1989) A distributional survey of the birds of the Mexican state of Oaxaca. In: Ornithological Monographs.
41. Blake ER (1958). Birds of Volcán de Chiriquí. Fieldiana Zoology 36: 499-576.
42. Blake ER (1961). Notes on a collection of birds from northeastern Colombia. Fieldiana Zoology 44: 25-44;
43. Blake ER (1962). Birds of the Sierra Macarena, eastern Colombia. Fieldiana Zoology 44: 69-112.
44. Blake JG (1992). Temporal variations in point counts of birds in a lowland wet forest in Costa Rica. Condor 94: 265-275.
45. Blake JG, Loiselle BA (2000). Diversity of birds along an elevational gradient in the Cordillera Central, Costa Rica. Auk 117: 663.
46. Blamires D, Valgas AB, Bispo PC (2001). Estrutura da comunidade de aves da Fazenda Bonsucesso, município de Caldazinha, Goiás, Brasil. Tangara 1: 101-113.
47. Bonadie WA, Bacon PR (2000). Year-round utilisation of fragmented palm swamp forest by red-bellied macaws (*Ara manilata*) and orange-winged parrots (*Amazona amazonica*) in the Nariva Swamp (Trinidad). Biological Conservation 95: 1-5.
48. Bond J (1936). Resident birds of the Bay Islands of Spanish Honduras. Proceedings of the Academy of Natural Sciences of Philadelphia 88: 353-364.
49. Bond J (1955). Additional notes on Peruvian birds I. Proceedings of the Academy of Natural Sciences of Philadelphia 107: 207-244.
50. Bond J, Meyer de Schauensee R (1940). On some birds from southern Colombia. Proceedings of the Academy of Natural Sciences of Philadelphia 92: 153-169.
51. Bond J, Meyer de Schauensee R (1943). The birds of Bolivia. Part II. Proceedings of the Academy of Natural Sciences of Philadelphia 95: 167-221.
52. Borges SH (1994). Listagem de aves em algumas localidades próximas a Boa Vista, Roraima. Boletim do Museu Paraense Emílio Goeldi, Série Zoologia 10: 191-202.
53. Borges SH (2004). Species poor but distinct: Bird assemblages in white sand vegetation in Jau National Park, Brazilian Amazon. Ibis 146: 114-124.
54. Borges SH, Cohn-Haft M, Carvalhaes AP, Henriques LMP, Pacheco JF, Whittaker A (2001). Birds of Jaú National Park, Brazilian Amazon: species check-list, biogeography and conservation. Ornitologia Neotropical 12: 109-112.
55. Botero JE, Lentijo GM, Lopez AM, Castellanos O, Aristizabal C, Franco N, Arbalaez D (2005). Adiciones a la lista de avifauna del municipio de Manizales. Boletín SAO 15: 69-87.
56. Brandan ZJ, Antelo CM (2000). Comparacion de la avifauna invernal en tres localidades del Bosque de Transición (Tucuman, Argentina). Acta Zoologica Lilloana 45: 257-262.
57. Brandt A, Machado RB (1990). Area de alimentacao e comportamento alimentar de *Anodorhynchus leari*. Ararajuba 1: 57-63.
58. Brodkorb P (1938). Five new birds from the Paraguayan chaco. Occasional Papers of the Museum of Zoology of the University of Michigan 367: 1-5.
59. Brodkorb P (1943). Birds from the Gulf lowlands of Southern Mexico. Occasional Papers of the Museum of Zoology of the University of Michigan 55: 1-88.
60. Buchanan OM (1965). Homosexual behavior in wild orange-fronted Parakeets (*Aratinga canicularis*). Condor 68: 399-400.
61. Bucher EH, Rodríguez EN (1986). Sobre la presencia del loro barranquero (*Cyanoliseus patagonus*) en el Uruguay. Hornero 12: 303-304.
62. Budin E (1931). Lista y notas sobre aves del N.O. argentino (Prov. de Jujuy). Hornero 4: 401-411.
63. Cabot J, Serrano P (1988). Distributional data of some non-passerine species in Bolivia. Bulletin of the British Ornithologists' Club 108: 187-193.

64. Cadena CD, Alvarez M, Parra JL, Jimenez I, Mejia CA, Santamaria M, Franco AM, Botero CA, Mejia GD, Umana AM, Calixto A, Aldana J, Londono GA (2000). The birds of CIEM, Tinigua National Park, Colombia: an overview of 13 years of ornithological research. *Cotinga* 13: 46-54.
65. Calchi R, Perez AN (1998). Lista de algunas aves con nuevos registros para el estado Trujillo, Venezuela. *Anartia* 8: 1-14.
66. Calvo YA, Duque AC (2002). Avifauna y conservacion en el territorio de San Jose del Palmar (Choco-Colombia). *Boletin Cientifico Museo de Historia Natural Universidad de Caldas* 6: 181-193.
67. Camargo EA (1957). Resultados ornitológicos de uma excursão ao estado do Maranhão. *Papéis Avulsos de Zoologia* 13: 75-84.
68. Camargo HFA (1962). Sobre as raças geográficas brasileiras de *Amazona braziliensis* (L., 1758) (Aves, Psittacidae). *Papéis Avulsos de Zoologia* 15: 67-77.
69. Camperi AR (1988). Notas sobre una coleccion de aves de los alrededores del Parque Nacional de Baritu y del Rio Tarija, Salta. *Hornero* 13: 20-28.
70. Camperi AR (1990). Notas sobre una colección de aves del Rio Santa María, Salta, Argentina. *Hornero* 13: 146-151.
71. Capper DR, Clay RP, Madrono NA, Barnett JM, Burfield IJ, Esquivel EZ, Kennedy CP, Perrens M, Pople RJ (2001). First records, noteworthy observations and new distributional data for birds in Paraguay. *Bulletin of the British Ornithologists' Club* 121: 23-36.
72. Capurro HA, Bucher EH (1988). Lista comentada de las aves del bosque Chaqueño de Joaquín V. Gonzalez, Salta, Argentina. *Hornero* 13: 39-46.
73. Cardona F (1998). Lista preliminar de aves del Ecoparque, ciudad de Manizales, Colombia. *Boletin Cientifico Museo de Historia Natural Universidad de Caldas* 2: 9-12.
74. Cardoso da Silva JM, Oren DC, Roma JC, Henriques LMP (1997). Composition and distribution patterns of the avifauna of an Amazonian upland savanna, Amapá, Brazil. *Ornithological Monographs* 48: 743-762.
75. Carnevalli N (1980). Contribuição ao estudo da ornitofauna da Serra do Caraça. *Lundiana* 1: 89-98.
76. Carnevalli N, Rigueira SE (1982). Estudo preliminar da distribuição de aves em cinco biótopos na área do campus da UFMG. *Lundiana* 2: 89-102.
77. Carriker MA (1910). An annotated checklist of the birds of Costa Rica including Cocos Island. *Annals of the Carnegie Museum* 6: 314-970.
78. Carriker MA, Meyer de Schauensee R (1935). An annotated list of two collections of Guatemalan birds in the Academy of Natural Sciences of Philadelphia. *Proceedings of the Academy of Natural Sciences of Philadelphia* 87: 411-455.
79. Carvalho CT, Carvalho J (1992). Nesting of *Pionus maximiliani* (Kuhl) and *Ara maracana* (Vieillot) in Galia, São Paulo, Brazil. *Revista Brasileira de Zoologia* 9: 363-365.
80. Casagrande DG, Beissinger SR (1997). Evaluation of four methods for estimating parrot population size. *Condor* 99: 445-457.
81. Casenave JL, Pelloto JP, Caziani SM, Mermoz M, Protomastro J (1998). Responses of avian assemblages to a natural edge in a Chaco semiarid forest in Argentina. *Auk* 115: 425-435.
82. Chani JM, Echevarria AL, Juri MD (2003). Lista comentada de las aves observadas en una transecta altitudinal desde el "Abra de Zenta" hasta "Finca El Oculto" (Orán, Salta). *Acta Zoologica Lilloana* 47: 142-147.
83. Chani JM, Lucero MM, Marigliano NL, Echevarria AL (1998). Lista comentada de aves de El Salvador, departamento Chuquisaca, Bolivia. *Acta Zoologica Lilloana* 44: 191-205.
84. Chapman CA (1931). The upper zonal bird-life of Mts. Roraima and Duida. *Bulletin of the American Museum of Natural History* 63: 1-135.
85. Chapman CA, Chapman LJ, Lefebvre L (1989). Variability in parrot flock size: possible functions of communal roosts. *Condor* 91: 842-847.
86. Chapman FM (1917). The distribution of bird-life in Colombia: a contribution to a biological survey of South America. *Bulletin of the American Museum of Natural History* 36: 1-729.
87. Chapman FM (1926). The distribution of bird-life in Ecuador: a contribution to the study of the origin of Andean bird-life. *Bulletin of the American Museum of Natural History* 55: 1-784.
88. Chavez-Fonnegra A, Fiorenzano M, Pantaleon-Lizazaru AM, Rodriguez-Gacha DR, Franco-Herrera A, Lopez-Victoria M (2005). Aves de un manglar en el PNN Tayrona, Caribe Colombiano. *Boletin SAO* 15: 3-12.
89. Chebez JC (1990). William Henry Partridge manuscripts: birds of Misiones (Argentina). Part I. *Nuestras Aves* 22: 20.
90. Chebez JC (1992). William Henry Partridge manuscripts: birds of Misiones (Argentina). Part V. *Nuestras Aves* 26: 14.
91. Chiarello AG (2000). Conservation value of a native forest fragment in a region of extensive agriculture. *Revista Brasileira de Biologia* 60: 237-247.
92. Cid FD, Caviedes-Vidal E (2005). Avifauna da Represa "La Florida" (San Luis, Argentina). *Atualidades Ornitológicas* 125: 10-18.
93. Cintra R, Yamashita C (1990). Habitat, abundância e ocorrência das espécies de aves do Pantanal de Poconé, Mato Grosso, Brasil. *Papéis Avulsos de Zoologia* 37: 1-21.
94. Clay RP (1999). A record of the belizensis subspecies of yellow-headed Amazon *Amazona oratrix* from the Peten, northern Guatemala. *Cotinga* 11: 20.
95. Coates-Estrada R, Estrada A, Meritt DJ (1993). Foraging by parrots (*Amazona autumnalis*) on fruits of *Stemmadenia donnell-smithii* (Apocynaceae) in the tropical rain forest of Los Tuxtlas, Mexico. *Journal of Tropical Ecology* 9: 121-124.

96. Coelho EP, Alves VS, Fernandez FAS, Soneghet MLL (1991). On the bird faunas of coastal islands of Rio de Janeiro state, Brazil. *Ararajuba* 2: 31-40.
97. Cohn-Haft M, Whittaker A, Stouffer PC (1997). A new look at the "species-poor" central Amazon: the avifauna north of Manaus, Brazil. *Ornithological Monographs* 48: 205-235.
98. Collar NJ (1995). On the possible occurrence of *Amazona dufresniana* in Brazil (Psittaciformes: Psittacidae). *Ararajuba* 3: 70.
99. Collar NJ, Gonzaga LP, Krabbe N, Madrono-Nieto A, Naranjo LG, Parker III TA, Wege DC (1992) Threatened birds of the Americas. International Council for Bird Preservation: Cambridge.
100. Collar NJ, Pittman AJ (1996). *Amazona kawalli* is a valid name for a valid species. *Bulletin of the British Ornithologists' Club* 116: 256-265.
101. Contreras JR, Roig VG, Gaii AG (1980). La avifauna de la cuenca del Rio Manso superior y la orilla sur de Lago Muscardi Parque Nacional Nahuel Huapi, Provincia de Rio Negro. *Historia Natural* 1: 41-48.
102. Cooper DS (1999). Notes on the birds of Isla Popa, western Bocas del Toro, Panama. *Cotinga* 11: 23-26.
103. Cooper DS (2000). The birds of Rio Negro Jaguar Preserve, Colonia Libertad, Costa Rica. *Cotinga* 8: 17-22.
104. Cougill S, Marsden SJ (2004). Variability in roost size in an *Amazona* parrot: Implications for roost monitoring. *Journal of Field Ornithology* 75: 67-73.
105. Craveiro RB, Miyaki CY (2000). Analysis of the genetic variability of *Propyrrhura maracana* (Psittaciformes, Aves) using DNA fingerprinting. *Ararajuba* 8: 79-84.
106. Cruz A, Gruber S (1981). The distribution, ecology and breeding biology of Jamaican amazon parrots. In: Conservation of New World Parrots. Proceedings of the ICBP Parrot Working Group, St. Lucia, 1980. (Pasquier, RF, ed.) pp. 103. Smithsonian Institution Press: Washington.
107. Cuadros T (1993). Distribucion ecologica de la avifauna de Araracuara (Amazonas). *Revista del I.C.N.E.* 4: 15-30.
108. Cuello J, Gerzenstein E (1962). Las Aves de Uruguay. *Comunicaciones del Museo de Historia Natural de Montevideo* 6: 1-199.
109. Cuervo AM, Stiles FG, Cadena CD, Toro JL, Londono GA (2003). New and noteworthy bird records from the northern sector of the Western Andes of Colombia. *Bulletin of the British Ornithologists' Club* 123: 7-24.
110. Dabbene R (1910). Ornitologia Argentina. *Anales del Museo Nacional de Buenos Aires* 3.
111. Dabbene R (1918). Dsitribución geográfica de algunas espécies de aves. *Hornero* 1: 96-99.
112. Daguerre JB (1922). Lista de aves coleccionadas y observadas en Rosas, F.C.S. *Hornero* 4: 259-271.
113. D'Angelo-Neto S, Venturin N, Oliveira-Filho ATJ, Costa FAF (1998). Avifauna de quatro fisionomias florestais de pequeno tamanho (5-8 ha) no campus da UFLA. *Revista Brasileira de Biologia* 58: 463-472.
114. Darlington PJ (1931). Notes on the birds of Rio Frio (near Santa María), Magdalena, Colombia. *Bulletin of the Museum of Comparative Zoology* 71: 349-421.
115. Darrieu CA (1979). *Aratinga aurea*, distribucion en America del Sur y variaciones subespecificas (Aves, Psittacidae). *Neotropica* 25: 119-125.
116. Darrieu CA (1980a). Las razas geograficas de '*Pyrrhura molinae*' (Aves, Psittacidae). *Revista del Museo Argentino de Ciencias Naturales "Bernardino Rivadavia" e Instituto Nacional de Investigacion de las Ciencias Naturales Zoologia* 12: 161-176.
117. Darrieu CA (1980b). Las razas geograficas de *Cyanoliseus patagonus* (Aves: Psittacidae). *Neotropica* 26: 207-216.
118. Darrieu CA (1980c). Las razas geograficas de *Myiopsitta monacha* (Boddaert) en la Argentina (Aves, Psittacidae). *Obra del Centenario del Museo de La Plata* 6: 187-194.
119. Darrieu CA (1981). Nuevos aportes al conocimiento de las razas geograficas de *Myiopsitta monacha* (Aves, Psittacidae). *Revista del Museo de La Plata Seccion Zoologia* 12: 281-289.
120. Darrieu CA (1982). Contribucion al conocimiento de las razas de *Enicognathus ferrugineus* (Muller) (Aves, Psittacidae). *Historia Natural* 2: 93-100.
121. Darrieu CA (1983a). Variaciones geograficas de *Pyrrhura frontalis* (Aves, Psittacidae). *Hornero* No. Extraordinario: 59-69.
122. Darrieu CA (1983b). Taxonomia de las razas geograficas de *Forpus xanthopterygius* (Aves, Psittacidae): nuevos aportes. *Revista de la Asociacion de Ciencias Naturales del Litoral* 14: 115-124.
123. Darrieu CA (1983c). Revision sistematica de las razas de *Pionus maximiliani* (Kuhl), (Aves, Psittacidae). *Hornero* No. extraordinario: 38-58.
124. Darrieu CA (1983d). Revision de las razas geograficas de *Amazona aestiva* (Linne) (Aves, Psittacidae). *Neotropica* 29: 3-10.
125. Davis H, Koenig SE (1997). *Amazona* parrots in Jamaica. *Pitirre* 10: 106.
126. Davis H, Zonfrillo B (2000). An erythristic yellow-billed parrot *Amazona collaria*. *Bulletin of the British Ornithologists' Club* 120: 58.
127. Davis SE (1993). Seasonal status, relative abundance, and behavior of the birds of Concepcion, Departamento Santa Cruz, Bolivia. *Fieldiana, Zoology* 71: 1-104.

128. Davis TJ (1986). Distribution and natural history of some birds from the Departments of San Martin and Amazonas, Northern Peru. *Condor* 88: 50-56.
129. Delgado BFS (1985a). A new subspecies of the painted parakeet (*Pyrrhura picta*) from Panama. *Ornithological Monographs* 36: 16-20.
130. Delgado BFS (1985b). Present situation of the forest birds of Panamá. In: *Conservation of Tropical Forest Birds*. (Diamond, JM, Lovejoy, TE, ed.). ICBP Technical Publication, no.4: Cambridge.
131. Diamond JM, Terborgh JW (1967). Observations on bird distributions and feeding assemblages along the rio Callaria, Department of Loreto, Peru. *Wilson Bulletin* 79: 273-282.
132. Dias RA, Mauricio GN (1998). Lista preliminar da avifauna da extremidade sudoeste do saco da Mangueira e arredores, Rio Grande, Rio Grande do Sul. *Atualidades Ornitológicas* 86: 10-11.
133. Dickey DR, van Rossen AJ (1938). The birds of El Salvador. *Bulletin of the Field Museum of Natural History* 23: 1.
134. Donatelli RJ, Costa TVV, Ferreira CD (2004). Dinâmica da avifauna em fragmento de mata na Fazenda Rio Claro, Lençóis Paulista, São Paulo, Brasil. *Revista Brasileira de Zoologia* 21: 97-114.
135. Donegan TM, Dalagos LM (1999). Ornithological observations from Reserva Natural Tambito, Cauca, southwest Colombia. *Cotinga* 12: 48-55.
136. Donegan TM, Huertas BC, Briceño ER, Arias JJ, Camargo I, Donegan MD (2004) Threatened Species of Serranía de los Yariquíes: Project Report. Colombian EBA Project Report Series No. 5. Published online by Fundación ProAves, Colombia at [www.proaves.org](http://www.proaves.org). 46 pp..
137. dos Anjos L (2001). Bird communities in five Atlantic forest fragments in southern Brazil. *Ornitologia Neotropical* 12: 11-27.
138. dos Anjos L, Bocon R (1999). Bird communities in natural forest patches in southern Brazil. *Wilson Bulletin* 111: 397-414.
139. dos Anjos L, Gimenes MR, Ribeiro AL, Mendonça LB (2000) A planície de inundação do Alto Rio Paraná: Avifauna. In: *Relatório Técnico. Área de Pesquisas Ecológicas de Longa Duração, Programa PELD/CNPq*, pp. 263-277.
140. dos Anjos L, Graf V (1993). Riqueza de Aves da Fazenda Santa Rita, Região de Campos Gerais, Estado do Paraná, Brasil. *Revista Brasileira de Zoologia* 10: 673-693.
141. Duran FJ, Sanchez JE (2003). Avifauna de la zona protectora el Rodeo, Costa Rica: anotaciones sobre diversidad e historial natural. *Brenesia* 60: 35-48.
142. Durand S (1998). Report from Dominica. Breeding biology and nesting habits of the red-necked or jaco (*Amazona arausiaca*) and imperial or sisserou (*A. imperialis*) parrots of Dominica. *Pittirre* 11: 72-73.
143. Eberhard JR (1996). Nest adoption by Monk Parakeets. *Wilson Bulletin* 108: 374-377.
144. Eberhard JR (1998). Breeding biology of the monk parakeet. *Wilson Bulletin* 110: 463-473.
145. Edwards EP, Lea RB (1955). Birds of the Monterrate area, Chiapas, Mexico. *Condor* 57: 31-54.
146. Efe MA, Mohr LV, Bugoni L, Scherer A, Scherer SB (2001). Inventário e distribuição da avifauna do Parque Saint' Hilaire, Viçosa, Rio Grande do Sul, Brasil. *Tangara* 1: 12-25.
147. Eisenmann E (1967). Behavior of orange-chinned parakeets in Panama. *Condor* 70: 86.
148. Eitniear JC, Aragon AT, McGehee SM (1997). Traditional use of limestone cave by nesting Green Parakeets (*Aratinga holochlora*). *Ornitologia Neotropical* 8: 243-244.
149. Eitniear JC, McGehee S, Waddell W (1994). Observations on the feeding upon *Psittacanthus calyculatus* by Brown-hooded Parrots (*Pionopsitta haematotis*). *Ornitologia Neotropical* 5: 119-120.
150. England MC (2000). The Landbird Monitoring Programme at Lamanai, Belize: a preliminary assessment. *Cotinga* 13: 32-43.
151. Fernandez-Juricic E, Alvarez EV, Martella MB (1997). Seasonal variation in abundance of Blue-crowned Parakeets (*Aratinga acuticaudata*) at the Chancani Reserve, Cordoba, Argentina. *Hornero* 14: 259-262.
152. Fernandez-Juricic E, Alvarez EV, Martella MB (1998a). Vocalizations of Blue-crowned conures (*Aratinga acuticaudata*) in the Chancani Reserve, Cordoba, Argentina. *Ornitologia Neotropical* 9: 31-40.
153. Fernandez-Juricic E, Alvarez EV, Martella MB (1998b). Current status of the Blue-fronted Amazon (*Amazona aestiva*) in the southern border of its distribution range. *Ardeola* 45: 77-82.
154. Fernandez-Juricic E, Martella MB (2000). Guttural calls of Blue-fronted Amazons: Structure, context, and their possible role in short range communication. *Wilson Bulletin* 112: 35-43.
155. French R (1992) A guide to the Birds of Trinidad and Tobago. Harrowood Books: Pennsylvania.
156. Figueiredo LFA, Custodio-Filho A (2003). Aves observadas em Unidades de Conservação do Estado de São Paulo por Antonio Flávio Barbosa. *Boletim CEO* 15: 30-43.
157. Figueiredo LFA, Gussoni COA, Campos RP (2000). Levantamento da avifauna do Parque Estadual Juquery, Franco da Rocha, São Paulo: uma avaliação auto-crítica das técnicas de campo para inventários ornitológicos. *Boletim CEO* 14: 36-50.
158. Figueiredo RA (1996). Complex interactions in nature: parrotlet feeding on fig fruits lessens seed dispersal and pollen flow. *Ciência e Cultura* 48: 282-283.
159. Fiora A (1933). El peso de las aves. *Hornero* 5: 170.

160. Fjeldsa J, Krabbe N, Ridgely RS (1987). Great green macaw *Ara ambigua* collected in north west Ecuador, with taxonomic comments on *Ara militaris*. Bulletin of the British Ornithologists' Club 107: 28-31.
161. Flores B, Rumiz DI, Cox GW (2001). Avifauna del bosque semideciduo Chiquitana (Santa Cruz - Bolivia) antes y despues de un aprovechamiento forestal selectivo. Ararajuba 9: 21-31.
162. Fortaleza DMR (1990). Observação dos psitacídeos do Espírito Santo e sul da Bahia no período de acasalamento e reprodução. Atualidades Ornitológicas 35: 9.
163. Franchin AG, Junior OM (2004). A riqueza da avifauna no Parque Municipal de Sabia, zona urbana de Uberlândia. Biotemas 17: 179-202.
164. Freile JF (2004). Range extensions and other noteworthy and new records from mainland Ecuador. Bulletin of the British Ornithologists' Club 124: 188.
165. Freile JF, Chaves JA (2004). Interesting distributional records and notes on the biology of bird species from a cloud forest reserve in north-west Ecuador. Bulletin of the British Ornithologists' Club 124: 6.
166. Freile JF, Moreano MV, Bonaccorso E, Santander T, Chaves JA (2004). Notas sobre la historia natural, distribución y conservación de algunas especies de aves amenazadas del suroccidente de Ecuador. Cotinga 21: 18-24.
167. Friedmann H (1927). Notes on some argentinian birds. Bulletin of the Museum of Comparative Zoology 68: 139-206.
168. Friedmann H (1948). Birds collected by the National Geographic Society's expedition to northern Brazil and southern Venezuela. Proceedings of United States National Museum 97: 373-569.
169. Friedmann H, Griscom L, Moore RT (1950). Distributional check-list of the birds of Mexico. Part I. Pacific Coast Avifauna 29: 1-201.
170. Friedmann H, Smith FD (1950). A contribution to the ornithology of northeastern Venezuela. Proceedings of the US National Museum 100: 411-538.
171. Friedmann H, Smith FD (1955). A further contribution to the ornithology of northeastern Venezuela. Proceedings of the US National Museum 104: 463-524.
172. Gaban RL, Raposo MA, Hofling E (2002). Description of a new species of *Pionopsitta* (Aves: Psittacidae) endemic to Brazil. Auk 119: 815-819.
173. Galetti M (1993). Diet of the scaly-headed parrot (*Pionus maximiliani*) in a semideciduous forest in southeastern Brazil. Biotropica 25: 419-425.
174. Galetti M (1997). Seasonal abundance and feeding ecology of parrots and parakeets in a lowland Atlantic forest of Brazil. Ararajuba 5: 115-126.
175. Galetti M, Pedroni F (1996). Notes on the diet of Peach-fronted Parakeet *Aratinga aurea* in the Serra do Cipó, Minas Gerais, Brazil. Cotinga 6: 59-60.
176. Galetti M, Rodrigues M (1992). Comparative seed predation on pods by parrots in Brazil. Biotropica 24: 222-224.
177. Garcia GA (1987). Lista de aves observadas en la reserva natural de Cupeyal, Provincia de Guantanamo, Cuba. Miscelanea Zoologica 31.
178. Garrido OH, Garcia FM (1975) Catálogo de las Aves de Cuba. Academia de Ciencias de Cuba: Habana.
179. Gehlbach FR, Dillon DO, Harrell HL, Kennedy SE, Wilson KR (1976). Avifauna of the Rio Corona, Tamaulipas, Mexico: northeastern limit of the tropics. Auk 93: 53-65.
180. Giacomelli E (1923). Catálogo sistemático de las aves útiles y nocivas de la Provincia de Rioja. Hornero 3: 66-84.
181. Gilardi JD, Munn CA (1998). Patterns of activity, flocking and habitat use in parrots of the Peruvian Amazon. Condor 100: 641-653.
182. Gimenes MR, Anjos L (2004). Spatial distribution of birds in three islands of the upper river Parana, southern Brazil. Ornitologia Neotropical 15: 71-85.
183. Gimenes MR, dos Anjos L (2000). Distribuição espacial de aves em um fragmento florestal do campus da Universidade Estadual de Londrina, norte do Paraná, Brasil. Revista Brasileira de Zoologia 17: 263-271.
184. Giner SBF, Barreto GR (1997). Caracterización de la avifauna y mastofauna de las sabanas del norte del Estado Bolívar, Venezuela. Acta Científica Venezolana 48: 47-57.
185. Girao e Silva WA, Albano CG (2002) Lista remissiva da avifauna cearense. (Ed. by Pernambuco, OdAd). Recife, pp. 60.
186. Gnam R, Burchsted A (1991). Population estimates for the Bahama Parrot on Abaco Island, Bahamas. Journal of Field Ornithology 62: 139-142.
187. Gnam R, Rockwell RF (1991). Reproductive potential and output of the Bahama Parrot *Amazona leucocephala bahamensis*. Ibis 133: 400-405.
188. Goeldi EA, Hagmann G (1902). Lista da aves indicadas como provenientes da Amazônia nos 27 volumes do "Catalogue of Birds" do British Museum de Londres. Boletim do Museu Paraense Emilio Goeldi 3: 276-327.
189. Gomez OHM (2005). Avifauna del campus de la Universidad de Quindío. Boletín SAO 15: 42-60.
190. Gonzaga LP (1988). Psitacídeos do Brasil: espécies que precisam de maior atenção. Atualidades Ornitológicas 26: 2-3.
191. Gonzalez OEM (1997). Birds of the lowland forest of Cerros del Sira, Central Peru. Cotinga 9: 57-59.

192. Gonzalez-Garcia F (1993). Avifauna de la Reserva de la Biosfera "Montes Azules", Selva Lacandona, Chiapas, Mexico. *Acta Zoologica Mexicana Nueva Serie* 55: 1-86.
193. Graham GL, Graves GR, Schulemberg TS, O'Neill JO (1980). Seventeen bird species new to Peru from the Pampas de Heath. *Auk* 97: 366-370.
194. Grantsau R, Camargo HFA (1989). Nova espécie brasileira de Amazona (Aves, Psittacidae). *Revista Brasileira de Biologia* 49: 1017-1020.
195. Graves GR, Giraldo JA (1987). Population status of the Rufous-fronted Parakeet (*Bolborhynchus ferrugineifrons*), a Colombian endemic. *Gerfaut* 77: 89-92.
196. Graves GR, Restrepo DU (1989). A new allopatric taxon in the *Hapalopsittaca amazonina* (Psittacidae) superspecies from Colombia. *Wilson Bulletin* 101: 369-376.
197. Greeney HF, Gelis RA, White R (2004). Notes on breeding birds from an Ecuadorian lowland forest. *Bulletin of the British Ornithologists' Club* 124: 28-37.
198. Grenier JL, Beissinger SR (1999). Variation in the onset of incubation in a neotropical parrot. *Condor* 102: 752-761.
199. Grillo HCZ, Bencke ZG (1995). Aves do Novo Campus da Universidade do Vale do Rio dos Sinos-UNISINOS, Sao Leopoldo, R.S. *Acta Biologica Leopoldensia* 17: 123-145.
200. Griscom L (1932a). The ornithology of the Caribbean Coast of extreme eastern Panamá. *Bulletin of the Museum of Comparative Zoology* 72: 303-372.
201. Griscom L (1932b). The distribution of bird life in Guatemala. *Bulletin of the American Museum of Natural History* 64: 1.
202. Griscom L, Greenway JC (1941). Birds of lower Amazonia. *Bulletin of the Museum of Comparative Zoology* 88: 86-150.
203. Guilherme E (2001). Avian community of the Campus and Parque Zoológico of the Universidade Federal do Acre, Brazil. *Tangara* 1: 57-73.
204. Guix JC, Martin M, Manosa S (1999). Conservation status of parrot populations in an Atlantic rainforest area of southeastern Brazil. *Biodiversity and Conservation* 8: 1079 - 1088.
205. Gussoni COA (2003). Avifauna do Campus da Universidade de São Paulo, Município de Pirassununga, Estado de São Paulo. *Boletim CEO* 15: 2-15.
206. Gussoni COA, Campos RP (2004). Avifauna da APA Federal da Bacia do Rio Paraíba do Sul nos municípios de Arujá e Santa Isabel (SP, Brasil). *Atualidades Ornitológicas* 117: 11-12.
207. Gyldenstolpe N (1945a). A contribution to the ornithology of northern Bolivia. *Kungliga Svenska Vetenskapsakademies Handlingar* 23: 1-300.
208. Gyldenstolpe N (1951). The ornithology of the Rio Purús region in western Brazil. *Arkiv for Zoologi* 2: 1-320.
209. Haffer J (1959). Notas sobre las aves de la región the Urabá. *Lozania* 12: 1-49.
210. Haffer J (1986). On the avifauna of the upper Patia Valley, southwestern Colombia. *Caldasia* 15: 533-553.
211. Haro JG, Gutierrez M (1992). La avifauna de una forestacion de pinos en Rio de los Sauces, Cordoba. *Hornero* 13: 214-218.
212. Haverschmidt F (1972). Birds records from Surinam. *Bulletin of the British Ornithologists' Club* 92: 49-53.
213. Haverschmidt F, Mees JF (1968) *Birds of Suriname*. Vaco, Uitgeversmaatschappij: Suriname.
214. Hayes FE, de Medina FEA (1988). Notes on the ecology of the avifauna of Chore, Department of San Pedro, Paraguay. *Hornero* 13: 59-70.
215. Hayes FE, Goodman SM, Lopez NE (1990). New or noteworthy bird records from the Matogrosense region of Paraguay. *Bulletin of the British Ornithologists' Club* 110: 94-103.
216. Hayes FE, Scharf PA (1995). The birds of Parque Nacional Ibycui, Paraguay. *Cotinga* 4: 14-19.
217. Hayes FE, Tamayo TG (1992). Bird densities along three tributaries of the Parana River in eastern Paraguay. *Hornero* 13: 254-256.
218. Hellmayr CE (1907a). Another contribution to the ornithology of the lower Amazons. *Novit.Zool.* 14: 1-39.
219. Hellmayr CE (1907b). On a collection of birds from Teffé, Rio Solimões, Brazil. *Novit.Zool.* 14: 40-91.
220. Hellmayr CE (1907c). On a collection of birds made by Mr. Hoffmanns on the Rio Madeira, Brazil. *Novit.Zool.* 14: 343-412.
221. Hellmayr CE (1910). The birds of the Rio Madeira. *Novit.Zool.* 17: 257-428.
222. Hellmayr CE (1929). A contribution to the ornithology of northeastern Brazil. *Field Museum of Natural History, Zoological Series* 12: 235-501.
223. Hennessey AB, Gomez MI (2003). Four bird species new to Bolivia: an ornithological survey of the Yungas Site Tokoaque, Madidi National Park. *Cotinga* 19: 25-33.
224. Henriques LMP, Oren DC (1997). The avifauna of Marajo, Caviana and Mexiana Islands, Amazon River estuary, Brazil. *Revista Brasileira de Biologia* 57: 357-382.
225. Henriques LMP, Wunderle MJ, Willig MR (2003). Birds of the Tapajos National Forest, Brazilian Amazon: a preliminary assessment. *Ornitologia Neotropical* 14: 307-338.

226. Hernandez YC, Perez RT (1997). Registro de aves de la sierra de Cubitas, Camaguey, Cuba. *Pitirre* 10: 93.
227. Herrera M (2001). Aves del Parque Regional Lomas de Arena. In: Diagnostico Biológico del Parque Regional Lomas de Arena. (Rodríguez, N., Vespa, RA, Rivero, K, ed.) pp. 42-46. Museo de Historia Natural Noel Kempff Mercado.
228. Herzog SK, Fjeldsa J, Kessler M, Balderrama JA (1999). Ornithological surveys in the Cordillera Cocapata, dept. Cochabamba, Bolivia, a transition zone between humid and dry intermontane Andean habitats. *Bulletin of the British Ornithologists' Club* 119: 162-177.
229. Herzog SK, Kessler M (2000). First records of barred parakeet *Bolborhynchus lineola* and Roraiman flycatcher *Myiophobus roraimae* in Bolivia. *Cotinga* 14: 104-105.
230. Hess GK (1997). Olive-throated parakeet (*Aratinga nana*) in the Dominican Republic. *Pitirre* 10: 56.
231. Hidas J (1973) Catálogo das Aves do Brasil, especialmente do Centro-Oeste e da Amazônia. Setor de Pesquisas e Recursos Naturais e Antropologia da Companhia de Desenvolvimento do Estado do Mato Grosso: Cuiabá.
232. Hilty SL (1997). Seasonal distribution of birds at a cloud-forest locality, the Anchicaya Valley, in western Colombia. *Ornithological Monographs* 48: 321-343.
233. Hilty SL, Brown WL (1986) A guide to the birds of Colombia. Princeton University Press: Princeton.
234. Hinkelmann C, Fiebig J (2001). An early contribution to the avifauna of Parana, Brazil. The Arkady Fiedler expedition of 1928/29. *Bulletin of the British Ornithologists' Club* 121: 116-127.
235. Hofling E, Lencioni F (1993). Avifauna da floresta atlantica, Regiao de Salesopolis, Estado de Sao Paulo. *Revista Brasileira de Biologia* 52: 361-378.
236. Holt EG (1928). An ornithological survey of the Serra do Itatiaya, Brazil. *Bulletin of the American Museum of Natural History* 52: 251-326.
237. Hombuckle J (1999). The birds of Abra Patricia and the upper Rio Mayo, San Martin, north Peru. *Cotinga* 12: 11-28.
238. Howell SNG, Webb S (1992). New and noteworthy bird records from Guatemala and Honduras. *Bulletin of the British Ornithologists' Club* 112: 42-49.
239. Humphrey PS, Peterson RT (1978). Nesting behavior and affinities of monk parakeets of southern Buenos Aires Province, Argentina. *Wilson Bulletin* 90: 544-552.
240. Hutto RL (1994). The composition and social organization of mixed-species flocks in a tropical deciduous forest in western Mexico. *Condor* 96: 105-118.
241. Ibarra A, Arriaga SW, Estrada A (2001). Avifauna asociada a dos cacaotales tradicionales en la region de la Chontalpa, Tabasco, Mexico. *Universidad y Ciencia* 17: 101-112.
242. Ingels J, Cleere N, Pelletier V (2003). Noteworthy observations on some French Guianan birds. *Alauda* 71: 59-67.
243. Johnson MA, Tomas WM, Guedes NMR (1997). On the hyacinth macaw's nesting tree: density of young manduvis around adult trees under three different management conditions in the Pantanal wetland, Brazil. *Ararajuba* 5: 185-188.
244. Joseph L (1988). Range extension of the red-fan parrot *Deroptyus accipitrinus* in Amazonian Brazil. *Bulletin of the British Ornithologists' Club* 108: 101-103.
245. Joseph L (1992). Notes on the distribution and natural history of the sun parakeet *Aratinga solstitialis solstitialis*. *Ornitologia Neotropical* 3: 17-26.
246. Joseph L (2000). Beginning an end to 63 years of uncertainty: the Neotropical parakeets known as *Pyrrhura picta* and *Pyrrhura leucotis* comprise more than two species. *Proceedings of the Academy of Natural Sciences of Philadelphia* 150: 279-292.
247. Joseph L (2002). Geographical variation, taxonomy and distribution of some Amazonian *Pyrrhura* parakeets. *Ornitologia Neotropical* 13: 337-363.
248. Joseph L, Stockwell D (2002). Climatic modeling of the distribution of some *Pyrrhura* parakeets of northwestern South America with notes on their systematics and special reference to *Pyrrhura caeruleiceps* Todd, 1947. *Ornitologia Neotropical* 13: 1-8.
249. Kantak GE (1979). Observations on some fruit-eating birds in Mexico. *Auk* 96: 183-186.
250. Kattan GH, Gomez M (1992). Body temperature of spectacled parrotlet nestlings in relation to body mass and brood size. *Condor* 94: 280-282.
251. Keith AR, Wiley JW, Latta SC, Ottenwalder JA (2003). The birds of Hispaniola, Haiti and the Dominican Republic. *BOU Checklist* 21.
252. King JR (1989). Notes on the birds of Rio Mazan Valley, Azuay Province, Ecuador, with special reference to *Leptopsittaca branickii*, *Hapalopsittaca amazonina pyrrhops* and *Metalura baroni*. *Bulletin of the British Ornithologists' Club* 109: 140-147.
253. Kirwan GM, Kirkconnell A (2002). The avifauna of Palpite, Cienaga de Zapata, Cuba, and the importance of the area for globally threatened and endemic birds. *Pitirre* 15: 101-109.
254. Krabbe N, Molina FS (1994). Avifaunistic results of a subtropical camp in the Cordillera del Condor, southeastern Ecuador. *Bulletin of the British Ornithologists' Club* 113: 55-61.
255. Kratter AW, Sillett TS, Chesser RT, O'Neill JP, Parker III TA, Castillo A (1993). Avifauna of a Chaco locality in Bolivia. *Wilson Bulletin* 105: 114-141.
256. Krauczuk ER, Baldo JD (2004). Contribuição para o conhecimento da avifauna de um fragmento de floresta com araucária em Misiones, Argentina. *Atualidades Ornitológicas* 119: 6.



257. Kristosch GC (1997). Use of tree cavities for roosting by the Reddish-bellied Parakeet (*Pyrrhura frontalis*). *Ararajuba* 5: 175-176.
258. Kristosch GC, Marcondes-Machado LO (2001). Diet and feeding behaviour of the reddish-bellied parakeet (*Pyrrhura frontalis*) in an Araucaria forest in southeastern Brazil. *Ornitologia Neotropical* 12: 215-233.
259. Krugel MM, dos Anjos L (2000). Bird communities in forest remnants in the city of Maringa, Parana State, Southern Brazil. *Ornitologia Neotropical* 11: 315-330.
260. Lanning DV (1991). Distribution and breeding biology of the red-fronted macaw. *Wilson Bulletin* 103: 357-365.
261. Lanning DV (1991b). Distribution and nest sites of the monk parakeet in Bolivia. *Wilson Bulletin* 103: 366-372.
262. Lanning DV, Shiflett JT (1983). Nesting ecology of Thick-billed parrots. *Condor* 85: 66-73.
263. Latta SC, Rivas FM, López N (1997). Confirmation of the olive-throated parakeet (*Aratinga nana*) in the Dominican Republic. *Pitirre* 10: 56.
264. Laverde OR, Stiles FG, Munera CR (2005). New records and updated inventory of the avifauna of the Serranía de las Quinchas, an important bird area (IBA) in Colombia. *Caldasia* 27: 247-265.
265. Lawrence GN (1876). Birds of southwestern Mexico collected by Francis E. Sumichrast. *Bulletin of the United States National Museum* 4: 1-52.
266. Lima A, Abe LM, Fabre VC (2001). Estudo comparativo da avifauna de um remanescente de floresta ombrófila mista, o bosque Capão de Imbuia - Curitiba - Paraná. *Atualidades Ornitológicas* 104: 11-12.
267. Lima PC, Santos SS, Lima RCFR (2004). Novos registros da ornitofauna na Patria da Arara-azul-de-Lear (*Anodorhynchus leari*, Bonaparte, 1856), Bahia, Brasil. *Atualidades Ornitológicas* 118: 6.
268. Lo VK (1995). Extensão da distribuição de *Guaruba guarouba* para o norte do Estado de Mato Grosso, Amazonia Meridional (Psittaciformes: Psittacidae). *Ararajuba* 3: 93-94.
269. Lopez NE (1992). Observaciones sobre la distribucion de psitacidos en el Departamento de Concepcion, Paraguay. *Boletin del Museo Nacional de Historia Natural del Paraguay* 11: 2-25.
270. López-Lánus B, Gastezzi P (2000). An inventory of the birds of Segua Marsh, Manabi, Ecuador. *Cotinga* 13: 59-64.
271. López-Lánus B, Salaman PGW, Cowley TP, Arango S, Renjifo LMI (2000). The threatened birds of the Rio Toche, Cordillera Central, Colombia. *Cotinga* 14: 17-23.
272. López-Lánus B, Socola J (2000). Estudio y conservación de *Ara ambigua* en la Reserva Cerro Blanco, sudeste de Ecuador. *Cotinga* 14: 24-25.
273. Lousada SA, Howell SNG (1997). *Amazona oratrix hondurensis*: a new subspecies of parrot from the Sula Valley of northern Honduras. *Bulletin of the British Ornithologists' Club* 117: 205.
274. Lowen JC, Clay RP, Barnett JM, Madrono NA, Pearman M, Lopez-Lanus B, Tobias JA, Durwyn CL, Brooks MT, Esquivel ZE, Reid MJ (1997). New and noteworthy observations on the Paraguayan avifauna. *Bulletin of the British Ornithologists' Club*. Dec. 117: 275-293.
275. Lucero MM, Chani JM, Brandan ZJ, Echevarria AL, Juri MD (2002). Lista de aves de San Miguel de Tucuman y Yerba Buena. *Acta Zoologica Lilloana* 46: 131-135.
276. Lyra-Neves RM, Dias MM, Azevedo-Junior SM, Telino-Junior WM, Lazarrabal MEL (2004). Comunidade de aves da Reserva Estadual de Gurjau, Pernambuco, Brasil. *Revista Brasileira de Zoologia* 21: 581-592.
277. Lyra-Neves RM, Telino WR, Jr., Nascimento JLX (1999) Aves da Fazenda Tamandua, Santa Therezinha, Paraiba. Instituto Brasileiro do Meio Ambiente e dos Recursos Naturais Renovaveis (IBAMA): Brasilia, D.F..
278. Machado RB, Lamas IR (1996). Avifauna associada a um reflorestamento de eucalipto no municipio de Antonio Dias, Minas Gerais. *Ararajuba* 4: 15-22.
279. Madroño NA, Clay RP, Robbins MB, Rice NH, Faucett RC, Lowen JC (1997a). An avifaunal survey of the vanishing interior Atlantic forest of San Rafael National Park, Departments Itapúa/Caazapá, Paraguay. *Cotinga* 7: 45-53.
280. Madroño NA, Esquivel EZ (1995). Noteworthy records and range extensions of some birds from Reserva Natural del Bosque Mbaracayú (Mbaracayú Forest Nature Reserve), Departamento de Canindeyú, Paraguay. *Bulletin of the British Ornithologists' Club* 117: 166.
281. Madroño NA, Robbins MB, Zyskowski K (1997b). Contribución al conocimiento ornitológico del bosque Atlántico Interior del Paraguay: Parque Nacional Caaguazú, Caazapá. *Cotinga* 7: 54-60.
282. Mahler JKF, Kindel A, Kindel E (1996). Lista Comentada das Espécies de Aves da Estação Ecológica do Taim, RS. *Acta Biologica Leopoldensia* 18: 69-103.
283. Maijer S, Herzog SK, Kessler M, Friggens MT, Fjeldsa J (1998). A distinctive new subspecies of the green-cheeked parakeet (*Pyrrhura molinae*, Psittacidae) from Bolivia. *Ornitologia Neotropical* 9: 185-191.
284. Manhaes MA, Loures-Ribeiro A (2005). Spatial distribution and diversity of bird community in an urban area of southeast Brazil. *Brazilian Archives of Biology and Technology* 48: 285-294.
285. Marcondes-Machado LO, Argel de Oliveira MM (1988). Comportamento alimentar de aves em Cecropia (Moraceae), em mata atlantica, no Estado de Sao Paulo. *Revista Brasileira de Zoologia* 4: 331-339.
286. Marcus MJ (1983). Additions to the avifauna of Honduras. *Auk* 100: 621-629.
287. Marsden SJ, Whiffin M, Sadgrove L, Guimaraes PRJ (2004). Bird community composition and species abundance on two inshore islands in the Atlantic forest region of Brazil. *Ararajuba* 11: 181-187.

288. Marterer BTP (1996) Avifauna do Parque Botânico do Morro do Baú. Fundação do Meio Ambiente - FATMA: Florianópolis.
289. Martin LF, Bucher EH (1993). Natal dispersal and first breeding age in Monk Parakeets. *Auk* 110: 930.
290. Martuscelli P (1994). Maroon-bellied Conures feed on gall-forming homopteran larvae. *Wilson Bulletin* 106: 769.
291. Martuscelli P, Yamashita C (1997). Rediscovery of the white-cheeked parrot *Amazona kawalli* (Grantsau and Camargo 1989), with notes on its ecology, distribution, and taxonomy. *Ararajuba* 5: 97-113.
292. Masramon DO (1983). Listas de aves del nordeste de San Luis. *Hornero No. Extraordinario*: 77-87.
293. Matus R, Barria C (1999). Adiciones a la lista de aves del Parque Nacional Torres del Paine. *Anales del Instituto de la Patagonia Serie Ciencias Naturales*. [print] 27: 105-113.
294. McLoughlin E, Burton PJK (1976). Notes on the Hawk-headed parrot *Deroptyus accipitrinus*. *Bulletin of the British Ornithologists' Club* 96: 68.
295. Mendonca-Lima A, Fontana CS (2000). Composicao, frecuencia e aspectos biologicos da avifauna no Porto Alegre Country Clube, Rio Grande do Sul. *Ararajuba* 8: 1-8.
296. Meyer de Schauensee R (1949). The birds of the Republic of Colombia. Their distribution and keys for their identification. *Caldasia* 23: 381-644.
297. Meyer de Schauensee R (1950). Colombian zoological survey. Part VII - A collection of birds from Bolívar, Colombia. *Proceedings of the Academy of Natural Sciences of Philadelphia* 102: 111-139.
298. Meyer de Schauensee R (1952). Colombian zoological survey. Part X. A collection of birds from southeastern Narino, Colombia. *Proceedings of the Academy of Natural Sciences of Philadelphia* 104: 1-33.
299. Meyer de Schauensee R (1952b). The birds of the Republic of Colombia. Their distribution and keys for their identification (addenda and corrigenda). *Caldasia* 26: 1115-1224.
300. Meyers JM, Arendt WJ, Lindsey GD (1996). Survival of radio-collared nestling Puerto Rican parrots. *Wilson Bulletin* 108: 159-163.
301. Miller AH (1947). The tropical avifauna of the upper Magdalena valley, Colombia. *Auk* 64: 351-381.
302. Mitchell MH (1960) Observations on birds of southeastern Brazil. University of Toronto Press: Toronto.
303. Monroe BLJ (1968). A distributional survey of the birds of Honduras. *Ornithological Monographs* 7.
304. Monroe BLJ, Howell TR (1993). Geographic variation in Middle American parrots of the *Amazona ochrocephala* complex. *Amazona* 11: 5-12.
305. Montalti D, Kopij G (2001). Bird community of inner La Plata City, Argentina. *Acta Ornithologica Warsaw* 36: 161-164.
306. Monteiro AR, de Mattos GT (1984). Avifauna do Parque Florestal de Vicos, Minas Gerais. *Experientiae* 29: 1-13.
307. Monteiro AR, Mattos GT (1983). Aves observadas e identificadas no municipio de Florestal, Minas Gerais. *Experientiae* 29: 19-30.
308. Monteiro MP, Brandao D (1995). Estrutura da comunidade de aves do Campus Samambaia da Universidade Federal de Goiás. *Ararajuba* 3: 21-26.
309. Monterrubio-Rico T, Enkerlin-Hoeflich EC (2004). Present use and characteristics of thick-billed parrot nest sites in northwestern Mexico. *Journal of Field Ornithology* 75: 96-103.
310. Morrison A (1948). Notes on the birds of the Pampas river valley, south Peru. *Ibis* 90: 119-126.
311. Moskovits D, Fitzpatrick JW, Willard DE (1985). Lista preliminar de aves da Estação Ecológica de Maracá, território de Roraima, e áreas adjacentes. *Papéis Avulsos de Zoologia* 36: 51-68.
312. Motta-Junior JC (1990). Estrutura trófica e composição das avifaunas de três habitats terrestres na região central do estado de São Paulo. *Ararajuba* 1: 65-71.
313. Naka LN (1997). Nest and egg description of an endemism of the Brazilian north-east: the cactus parakeet, *Aratinga cactorum*. *Ararajuba* 5: 182-185.
314. Naka LN, Barnett JM, Kirwan GM, Tobias JA, de Azevedo MAG (2000). New and noteworthy bird records from Santa Catarina state, Brazil. *Bulletin of the British Ornithologists' Club* 120: 237-250.
315. Naoki K, Duran FJ, Sanchez JE (2003). La avifauna de un fragmento de bosque secundario en el Valle Central, Costa Rica: su estacionalidad e implicacion para la conservacion. *Brenesia* 60: 49-64.
316. Naranjo LG (1992). Estructura de la avifauna en un area ganadera en el Valle del Cauca, Colombia. *Caldasia* 17: 55-65.
317. Narosky T, Di Giacomo AG (1993) Las aves de la Provincia de Buenos Aires: distribución y estatus. *Asociación Ornitológica del Plata: Buenos Aires*.
318. Narosky T, Lozzia LM (1988). Birds of El Bagual Reserve, Formosa Province, Argentina. *Nuestras Aves* 15: 7.
319. Nascimento JLX, Barros YM, Yamashita C, Alves EM, Bianchi CA, Paiva AA, Menezes AC, Alves DM, Silva J, Lins LV, Silva TMA (2001). Censos de araras-azuis-de-Lear (*Anodorhynchus leari*) na natureza. *Tangara* 1: 135-138.
320. Nascimento JLX, Nascimento IL, Azevedo-Junior SM (2000). Aves da Chapada do Araripe: biologia e conservação. *Ararajuba* 8: 115-125.

321. Nascimento J LX, Schulz-Neto A (1996) Aves da Estacao Ecologica de Aiubaba, Cear  (Brasil): Brasilia, D.F..
322. Naumburg EM (1930). The birds of Matto Grosso. A Report on the birds secured by the Roosevelt-Rondon Expedition. Bulletin of the American Museum of Natural History 60: 1-432.
323. Navarrete L (2003). White-breasted parakeet *Pyrrhura albipectus*: a new record for Peru. Cotinga 19: 79.
324. Navarro CI, Brandan ZJ, Antelo CM, Marigliano NL (2000). Avifauna invernal en una localidad del Bosque Chaque o Serrano (Las Tipas, Tucuman, Argentina). Acta Zoologica Lilloana 45: 233-240.
325. Navarro JL, Martella MB, Bucher EE (1992). Breeding season and productivity of Monk Parakeets in Cordoba, Argentina. Wilson Bulletin 104: 413.
326. Navarro SAG (1992). Altitudinal distribution of birds in the Sierra Madre del Sur, Guerrero, Mexico. Condor 94: 29-39.
327. Navas JR, Bo NA (2001). Aportes al conocimiento de la distribucion, la cria y el peso de aves de las provincias de Mendoza y San Juan, Republica Argentina. Segunda parte (Aves: Falconidae, Scolopacidae, Thinocoridae, Columbidae, Psittacidae, Strigidae, Caprimulgidae, Apodidae, Furnariidae, Rhinocryptidae y Tyrannidae). Hornero 16: 31-37.
328. Navas JR, B  NO (1986). Notas sobre una colecci n de aves del Parque Nacional de Lihu  Calel, La Pampa, Argentina. Hornero 12: 250.
329. Nebot JC (1999). First report of the Rose-ringed Parakeet (*Psittacula krameri*) in Venezuela and preliminary observations on its behavior. Ornithologia Neotropical 10: 115-117.
330. Noegel R (1981). *Amazona leucocephala*: status in the wild and potential for captive breeding. In: Conservation of New World Parrots. Proceedings of the ICBP Parrot Working Group, St. Lucia, 1980. (Pasquier, RF, ed.) pp. 73. Smithsonian Institution Press: Washington.
331. Nores M, Yzurieta D (1981). Nuevas localidades para aves argentinas. Historia Natural 2: 33-42.
332. Nores M, Yzurieta D (1982). Nuevas localidades para aves argentinas. Parte II. Historia Natural 13: 101-104.
333. Norton DW (1972). Notes on rare and previously unreported birds from Ecuador. Auk 89: 889-894.
334. Novaes F, Lima A (1992). Aves das campinas, capoeiras e manguezais do Leste do Par . Boletim do Museu Paraense Emilio Goeldi Serie Zoologia 8: 271-303.
335. Novaes FC (1957). Contribui  o a ornitologia do noroeste do Acre. Boletim do Museu Paraense Emilio Goeldi 9: 1-18.
336. Novaes FC (1958). As aves e as comunidades bi ticas no alto Rio Jur  , Territ rio do Acre. Boletim do Museu Paraense Emilio Goeldi, Nova S rie Zoologia 14: 1-13.
337. Novaes FC (1960). Sobre uma cole  o de aves do sudeste do Estado do Par . Arquivos de Zoologia 11: 133-146.
338. Novaes FC (1969). An lise ecol gica de uma avifauna da regi o do rio Acar , Estado do Par . Boletim do Museu Paraense Emilio Goeldi, S rie Zoologia 69: 1-52.
339. Novaes FC (1981). A estrutura da especie nos periquitos do genero Pionites Heine (Psittacidae, Aves). Boletim do Museu Paraense Emilio Goeldi Nova Serie Zoologia 106.
340. Nunes MFC (2003) Distribu  o do maracan  verdadeiro *Primolius maracana* (Psittacidae): prefer ncia de habitat e fatores que influenciam na manuten  o de suas popula  es remanescentes. In: Department of Ecology: University of Sao Paulo, Brazil.
341. Olmos F (1996). Missing species in S o Sebasti o island, southeastern Brazil. Pap is Avulsos de Zoologia 39: 329-349.
342. Olmos F (2003). Birds of Mata Estrela private reserve, Rio Grande do Norte, Brazil. Cotinga 20: 26-30.
343. Olmos F, Martuscelli P, Silva e Silva R (1998). Distribution and dry-season ecology of Pfrimer's conure *Pyrrhura pfrimeri*, with a reappraisal of Brazilian *Pyrrhura "leucotis"*. Ornithologia Neotropical 8: 121-132.
344. O'Neill JP, Munn CA, Franke J I (1991). *Nannopsittaca dachilleae*, a new species of parrotlet from eastern Peru. Auk 108: 225-229.
345. O'Neill JP, Parker III TA (1977). Taxonomy and range of Pionus seniloides in Peru. Condor 79: 274.
346. Oniki Y, Willis EO (1983). A study of breeding birds of the Bel m area, Brazil: 2. Psittacidae to Trochilidae. Ci ncia e Cultura 35: 956-964.
347. Ordano MA, Bosisio AC (1998). Catalogo de aves del Museo Provincial de Ciencias Naturales "Florentino Ameghino", Santa Fe, Argentina. Museo Provincial de Ciencias Naturales "Florentino Ameghino". Serie Catalogos, No.7.
348. Oren D (1990). New and reconfirmed bird records from the State of Maranh o, Brazil. Goeldiana Zoologia 4: 1.
349. Oren DC, Parker III TA (1997). Avifauna of the Tapajos National Park and vicinity, Amazonian Brazil. Ornithological Monographs 48: 493-525.
350. Oren DC, Willis EO (1981). New Brazilian records for the golden parakeet (*Aratinga guarouba*). Auk 98: 394-396.
351. Orfila R (1930). Psit cidos Argentinos. Hornero 7: 1-21.
352. Ortiz-Pulido R, Silva HGG, Gonzalez-Garcia F, Alvarez AA (1995). Avifauna del Centro de Investigaciones Costeras La Mancha, Veracruz, Mexico. Acta Zoologica Mexicana Nueva Serie 66: 87-118.
353. Pacheco JF (1989). Acrecimos a lista de aves do Municipio do Rio de Janeiro. Boletim FBCN 23: 104-120.
354. Pacheco JF (1995). Os psit c deos da Esta  o Ecol gica de Mamirau , Amazonas. Atualidades Ornitol gicas 63: 3.
355. Pacheco JF (2000). Alguns registros historicos para a ornitologia do Amap . Atualidades Ornitol gicas 96: 5.

356. Pacheco JF, Fonseca PSM (2002). Resultados de uma excursão ornitológica a determinadas áreas dos estados de São Paulo, Santa Catarina e Rio Grande do Sul em janeiro de 1990. *Atualidades Ornitológicas* 106: 3-4.
357. Pacheco JF, Parrini RM, Fonseca PSM, Whitney BM, Maciel MC (1996). Novos registros de aves para o Estado do Rio de Janeiro: região norte. *Atualidades Ornitológicas* 72: 10.
358. Pacheco NN, Olmos JL, Rodriguez CMP (1997). Listado preliminar de la avifauna de la Sierra de Nipe, Mayari, Holguín, Cuba. *Pitirre* 10: 65.
359. Paranhos SJ, Marcondes-Machado LO (2000). Comportamento reprodutivo de *Brotogeris versicolorus chiriri* (Aves, Psittacidae) em São Paulo, Brasil. Breeding behavior of *Brotogeris versicolorus chiriri* (Aves, Psittacidae) in São Paulo, Brazil. *Iheringia Série Zoologia* 88: 61-66.
360. Parker III TA, Castillo U, Gell-Mann M, Rocha O O (1991). Records of new and unusual birds from northern Bolivia. *Bulletin of the British Ornithologists' Club* 111: 120-138.
361. Parker III TA, Remsen JVJ (1987). Fifty-two Amazonian bird species new to Bolivia. *Bulletin of the British Ornithologists' Club* 107: 94-107.
362. Parker III TA, Schulenberg TS, Graves GR, Braun MJ (1985). The avifauna of the Huancabamba region, northern Peru. *Ornithological Monographs* 36.
363. Parrini RM, Raposo MA, Pacheco JF, Carvalhães AMP, Mello Jr. CV, Fonseca PSM, Minns JC (1999). Birds of the Chapada Diamantina, Bahia, Brazil. *Cotinga* 11: 86-95.
364. Pasquier RF (1981) Conservation of New World Parrots. In: *Proceedings of the ICBP Parrot Working Group Meeting*. St. Lucia: Smithsonian Institution Press for the ICBP Technical Publication 1.
365. Paynter RA (1955). The ornithology of the Yucatán Peninsula. *Bulletin of the Peabody Museum of Natural History* 9.
366. Pearce-Higgins JW (2000). The avian community structure of a Bolivian savanna on the edge of the Cerrado system. *Hornero* 15: 77-84.
367. Pearson DL (1974). Range extensions and new records for bird species in Ecuador, Peru and Bolivia. *Condor* 77: 96-99.
368. Pereira JJO (1990). A preservação do papagaio-verdadeiro e outros psitacídeos na Reserva Particular do Patrimônio Natural, Fazenda Morrinhos e arredores. *Atualidades Ornitológicas* 66: 12.
369. Peres CA, Whittaker A (1991). Annotated checklist of the bird species of the upper Rio Urucu, Amazonas, Brazil. *Bulletin of the British Ornithologists' Club* 111: 156-171.
370. Pereyra JA (1949). Avifauna argentina (contribución a la ornitología). *Hornero* 9: 216.
371. Perez JH (1990). Catita chiriri (*Brotogeris versicolurus*) en Capital Federal. *Nuestras Aves* 21.
372. Perez-Eman J, Sharpe CJ, Lentino M, Prum RO, Carreno IJ (2003). New records of birds from the Summit of Cerro Guaiquinima, Estado Bolívar, Venezuela. *Bulletin of the British Ornithologists' Club* 123: 78.
373. Peris SJ (1997). Distribution of birds on eastern and western slopes of the Sierra Aconquija in the northwestern Argentine Andes. *Studies on Neotropical Fauna and Environment* 32: 135-141.
374. Peters JL (1917). Birds from the northern coast of the Dominican Republic. *Bulletin of the Museum of Comparative Zoology* 61: 391-426.
375. Peters JL (1931). Additional notes on the birds of the Almirante Bay Region of Panama. *Bulletin of the Museum of Comparative Zoology* 71: 293-421.
376. Phelps WH (1977). Una nueva especie y dos nuevas subespecies de aves (Psittacidae, Furnariidae) de la Sierra de Perija cerca de la divisoria colomb-venezolana. *Boletín Sociedad Venez. Ciencias Naturales* 33: 43-53.
377. Phelps WH, Phelps WHJ (1958). Lista de las aves de Venezuela con su distribución. No Passeriformes. *Boletín de la Sociedad Venezolana de Ciencias Naturales* 9.
378. Philippi RAB (1941). Notas de ornitología chilena. *Hornero* 8: 17-24.
379. Pichorim M, Boçon R (1996). Estudo da composicao avifaunistica dos municipios de Rio Azul e Mallet, Parana, Brasil. *Acta Biologica Leopoldensia* 18: 129.
380. Pinto OMdO (1938). Catálogo das aves do Brasil. *Revista do Museu Paulista* 22: 1a. parte.
381. Pinto OMdO (1940a). Aves de Pernambuco. *Arquivos de Zoologia* 1: art.5.
382. Pinto OMdO (1940b). Nova contribuição à ornitologia do Mato Grosso. *Arquivos de Zoologia* 2: Art.1.
383. Pinto OMdO (1945). Sobre as formas brasileiras do gênero *Forpus*. *Revista Argentina de Zoogeografia* 5: 11-19.
384. Pinto OMdO (1947). Contribuição à ornitologia do Baixo Amazonas: estudo crítico de uma coleção de aves do Pará. *Arquivos de Zoologia* 5: 311.
385. Pinto OMdO (1951). Aves do Itatiaia: lista remissiva e novas achegas a avifauna da região. *Papéis Avulsos de Zoologia* 10: 155-208.
386. Pinto OMdO (1953). Sobre a coleção Carlos Estevão de peles, ovos e ninhos da região de Belém (Pará). *Papéis Avulsos de Zoologia* 11: 113-222.
387. Pinto OMdO (1954). Resultados ornitológicos de duas viagens científicas ao estado de Alagoas. *Papéis Avulsos de Zoologia* 12: 1-98.
388. Pinto OMdO (1960). Algumas adendas à avifauna brasileira. *Papéis Avulsos de Zoologia* 14: 17-29.

389. Pinto OMdO (1966). Estudo crítico e catálogo remissivo das aves do território federal de Roraima. Cadernos da Amazônia 8: 1-176.
390. Pinto OMdO (1978) Novo catálogo das Aves do Brasil. Primeira parte: Aves não passeriformes e passeriformes não Oscines, com exclusão da família Tyrannidae. Empresa Gráfica da Revista dos Tribunais, S.A.: São Paulo.
391. Pinto OMdO, Camargo EA (1948). Sobre uma coleção de aves do rio das Mortes (Estado de Mato Grosso). Papéis Avulsos de Zoologia 8: .
392. Pinto OMdO, Camargo EA (1952). Nova contribuição à ornitologia do Rio das Mortes. Papéis Avulsos de Zoologia 10: 213-234.
393. Pinto OMdO, Camargo EA (1954). Resultados ornitológicos de uma expedição ao território do Acre pelo Departamento de Zoologia. Papéis Avulsos de Zoologia 11: 371-418.
394. Pinto OMdO, Camargo EA (1955). Lista anotada das aves colecionadas nos limites ocidentais do estado do Paraná. Papéis Avulsos de Zoologia 9: 215-234.
395. Pinto OMdO, Camargo EA (1957). Sobre uma coleção de aves da região de Cachimbo (sul do estado do Pará). Papéis Avulsos de Zoologia 13: 71-73.
396. Pitter E, Christiansen MB (1997). Behavior of individuals and social interactions of the red-fronted macaw *Ara rubrogenys* in the wild during the midday arrest. Ornitologia Neotropical 8: 133-145.
397. Pizo MA, Simão I, Galetti M (1997). Daily variation in activity and flock size of two parakeet species from southeastern Brazil. Wilson Bulletin 109: 343.
398. Pizo MA, Simao I, Galleti M (1995). Diet and flock size of sympatric parrots in the Atlantic forest of Brazil. Ornitologia Neotropical 6: 87-95.
399. Politi N, Rivera LO (2005). Abundance and distribution of parrots along the elevational gradient of Calilegua National Park, Argentina. Ornitologia Neotropical 16: 43-52.
400. Poulsen BO (1992). Range extensions of orange-cheeked parrot and white-browed purpletuft in Amazonian Venezuela. Bulletin of the British Ornithologists' Club 112: 276-277.
401. Poulsen BO, Krabbe N (1998). Avifaunal diversity of five high-altitude cloud forests on the Andean western slope of Ecuador: Testing a rapid assessment method. Journal of Biogeography 25: 83-93.
402. Pozza DD (2002). Registros da avifauna ameaçada de extinção no nordeste do estado de São Paulo. Ararajuba 10: 241-243.
403. Pozza DD, Pires JSR (2003). Bird communities in two fragments of semideciduous forest in rural Sao Paulo state. Revista Brasileira de Biologia 63: 307-319.
404. Prestes NP, Martinez J, Meyrer PA, Hansen LH, Xavier MN (1997). Nest characteristics of the red-spectacled amazon *Amazona pretrei* Temminck, 1830 (Psittacidae). Ararajuba 5: 151-158.
405. Puebla-Olivares F, Rodríguez-Ayala E, Banos-Blanca EH, Navarro AGS (2002). Status and conservation of the avifauna of the Yaxchilan Natural Monument, Chiapas, Mexico. Ornitologia Neotropical 13: 381-396.
406. Raffaele HA, Wiley JW, Garrido OH, Keith AR, Raffaele J (1998) A guide to the birds of the West Indies. Princeton University Press: New Jersey.
407. Ragusa-Neto J (2004). Flowers, fruits, and the abundance of the yellow-chevroned parakeet (*Brotogeris chiriri*) at a gallery forest in the South Pantanal (Brazil). Brazilian Journal of Biology 64: 867-877.
408. Rassmussen JF, Rahbek C, Poulsen BO, Poulsen MK, Bloch H (1996). Distributional records and natural history notes on threatened and little known birds from southern Ecuador. Bulletin of the British Ornithologists' Club 116: 26.
409. Reijns PJ, van der Salm JNC (1981). Some ecological aspects of the yellow-shouldered amazon (*Amazona barbadensis rothschildi*). In: Conservation of New World Parrots. Proceedings of the ICBP Parrot Working Group, St. Lucia, 1980.(Pasquier, RF, ed.) pp. 227. Smithsonian Institution Press.
410. Remsen JVJ, Ridgely RS (1980). Additions to the avifauna of Bolivia. Condor 82: 69-75.
411. Remsen JVJ, Traylor MAJ, Parkes KC (1986). Range extensions for some Bolivian birds, 2. (Columbidae to Rhinocryptidae). Bulletin of the British Ornithologists' Club 106: 22-32.
412. Renjifo L (1999). Composition changes in a subandean avifauna after long-term forest fragmentation. Conservation Biology 13: 1124.
413. Renssen TA (1974). Twelve bird species new for Surinam. Ardea 62: 118-129.
414. Renton K (2002). Seasonal variation in occurrence of macaws along a rainforest river. Journal of Field Ornithology 73: 15-19.
415. Renton K (2002b). Influence of environmental variability on the growth of Lilac-crowned parrot nestlings. Ibis 144: 331-339.
416. Renton K, Salinas-Melgoza A (1999). Nesting behavior of the Lilac-crowned Parrot. Wilson Bulletin 111: 488.
417. Ribero AM (1920). Revisao dos psittacideos brasileiros. Revista do Museu Paulista 12: 1-82.
418. Ribon R (2000). Lista preliminar da avifauna do município de Ijaci, Minas Gerais. A preliminary inventory of wild bird species in Ijaci county, state of Minas Gerais. Revista Ceres 47: 665-682.
419. Ribon R, Lamas IR, Gomes HB (2004). Avifauna da Zona da Mata de Minas Gerais: municípios de Goianá e Rio Novo, com alguns registros para Coronel Pacheco e Juiz de Fora. Revista Arvore 28: 291-305.
420. Ridgely RS (1980). Notes on some rare or previously unrecorded birds in Ecuador with additional information on identification and habitat. American Birds 34: 242-248.

421. Ridgely RS (1981). The current distribution and status of mainland Neotropical parrots. In: Smithsonian Institution Press for the International Council for Bird Preservation Technical Publication No. 1, XIII.(Pasquier, RF, ed.) pp. 233-384. .
422. Ridgely RS, Gaulin SJC (1980). The birds of Finca Meremberg, Hulia Department, Colombia. Condor 82: 379-391.
423. Ridgely RS, Robbins MB (1988). *Pyrrhura orcesi*, a new parakeet from southwestern Ecuador, with systematic notes on the *P. melanura* complex. Wilson Bulletin 100: 173-182.
424. Rigueira SE, Paula MO, Carnevalli N (1982). Estudo da avifauna da represa da Pampulha e de sua área de influência - Belo Horizonte-MG. Lundiana2.
425. Robbins MB, Capparella AP, Ridgely RS, Cardiff SW (1991). Avifauna of the Rio Maniti and Quebrada Vainilla, Peru. Proceedings of the Academy of Natural Sciences of Philadelphia 143: 145-159.
426. Robbins MB, Faucett RC, Rice NH (1999). Avifauna of a Paraguayan Cerrado locality: Parque Nacional Serrania San Luis, depto. Concepcion. Wilson Bulletin 111: 216-228.
427. Robbins MB, Krabbe N, Rosenberg GH, Molina FS (1994). The tree line avifauna at Cerro Mongus, Prov. Carchi, northeastern Ecuador. Proceedings of the Academy of Natural Sciences of Philadelphia 145: 209-216.
428. Robbins MB, Parker III TA, Allen SE (1985). The avifauna of Cerro Pirre, Darien, eastern Panama. Ornithological Monographs36.
429. Robbins MB, Ridgely RS (1990). The avifauna of an upper tropical cloud forest in southwestern Ecuador. Proceedings of the Academy of Natural Sciences of Philadelphia 142: 59-71.
430. Robbins MB, Ridgely RS, Schulenberg TS, Gill FB (1987). The avifauna of the Cordillera de Cutucu, Ecuador, with comparisons to other Andean localities. Proceedings of the Academy of Natural Sciences of Philadelphia 139: 243-259.
431. Robinson WD (2001). Changes in abundance of birds in a Neotropical forest fragment over 25 years: a review. Animal Biodiversity and Conservation 24: 51-65.
432. Rocha CFD, Bergallo HdG, Siciliano S (1988). Migracao circadiana em cinco especies de psitacideos em Parintins-Am. Acta Amazonica 18: 371-374.
433. Rocha O (1990). Lista preliminar de aves de la Reserva de la Biosfera Estacion Biologica Beni. Ecologia en Bolivia 15: 57-68.
434. Roda SA, Carlos CJ, Rodrigues RC (2003). New and noteworthy records for some endemic and threatened birds of the Atlantic forest of north-eastern Brazil. Bulletin of the British Ornithologists' Club 123: 227.
435. Rodrigues FM, Noronha MLM (2003). The avifauna of low elevations in the Serra dos Orgãos, Rio de Janeiro state, south-east Brazil. Cotinga 20: 51-56.
436. Rodrigues M, Carrara LA, Faria LP, Gomes HB (2005). Aves do Parque Nacional da Serra do Cipó: o Vale do rio Cipo, Minas Gerais, Brasil. Revista Brasileira de Zoologia 22: 326-338.
437. Rodrigues RC, Amaral ACA, Salles LGJ (2004) Aves do Macico de Baturite, Ceara. Instituto Brasileiro dos Recursos Naturais Renovaveis (IBAMA): Brasilia, D.F..
438. Rodriguez-Estrella R, Mata E, Rivera L (1992). Ecological notes on the green parakeet of Isla Socorro, Mexico. Condor 94: 523-525.
439. Rodriguez-Estrella R, Rivera-Rodriguez L, Anguiano F (1995). Nest-site characteristics of the Socorro green parakeet. Condor 97: 575-577.
440. Rodriguez-Vidal JA (1959). Puerto Rico Parrot (*Amazona vittata vittata*). Monographs of the Department of Agriculture and Commerce 1.
441. Roe NA, Rees WE (1979). Notes on the puna avifauna of Azangaro Province, Department of Puno, southern Peru. Auk 96: 475-482.
442. Rojas RAF, Vivacanco CB, Stappung ESC, Rubke RL, Orellana SA (2000). Avifauna del Santuario de la Naturaleza Los Huemules del Niblinto, Region del Bio Bio, Chile. Boletín Chileno de Ornitología 7: 2-12.
443. Rojas-Soto OR, Sahagun-Sanchez FJ, Navarro AG (2001). Additional information on the avifauna of Queretaro, Mexico. Cotinga 15: 48-52.
444. Roth P (1984). Reparticao do habitat entre psitacideos simpaticos no Sul da Amazonia. Acta Amazonica 14: 175-221.
445. Rumboll MAE (1990). Tres aves nuevas para la Argentina. Nuestras Aves22.
446. Russell SM (1964). A distributional survey of the birds of Honduras. Ornithological Monographs 1.
447. Salaman PGW, Donegan TM, Cuervo AM (1999a). Ornithological surveys in Serrania de los Churumbelos, southern Colombia. Cotinga 12: 29-35.
448. Salaman PGW, Lopez Lanus B, Krabbe N (1999b). Critically endangered: yellow-eared parrot *Ognorhynchus icterotis* in Colombia. Cotinga 11: 39-41.
449. Salaman PGW, Stiles FG, Bohorquez CI, Alvarez RM, Umana AM, Donegan TM, Cuervo AM (2002). New and noteworthy bird records from the east slope of the Andes of Colombia. Caldasia 24: 157-189.
450. Salvador SA, Narosky S (1984). Notas sobre nidificación de aves Andinas en la Argentina. Hornero 12: 184-188.
451. Salvadori T (1891) Catalogue of the Psittaci, or Parrots, in the collection of the British Museum. London: Trustees British Museum (Natural History), London: 1-658.
452. Sanaiotti TM, Cintra R (2001). Breeding and migrating birds in an Amazonian savanna. Studies on Neotropical Fauna and Environment 36: 23-32.

453. Sandercock BK, Beissinger SR, Stoleson SH, Melland RR, Hughes CR (2000). Survival rates of a Neotropical parrot: implications for latitudinal comparisons of avian demography. *Ecology* 81: 1351-1370.
454. Santiago-Alarcon D (2003). Avifauna de dos comunidades de Selva Baja Espinosa de Tinto de la Reserva de la Biosfera Pantanos de Centla. *Ornitologia Neotropical* 14: 515-530.
455. Santos MPD (2000). Utilizacao da macambira, *Bromelia laciniosa* (Bromeliaceae) como item alimentar, por *Aratinga cactorum* (Aves - Psittacidae). *Atualidades Ornitológicas* 96: 10.
456. Santos MPD (2001a). Composição da avifauna nas áreas de proteção ambiental Serra da Tabatinga e Chapada das Mangabeiras, Brasil. *Boletim do Museu Paraense Emílio Goeldi, Série Zoologia* 17: 43-67.
457. Santos MPD (2001b). Dieta da arara-vermelha-grande (*Ara chloroptera*) na Chapada das Mangabeiras, sul do Piauí, Brasil. *Tangara* 1: 131-134.
458. Sazima I (1989). Peach-fronted Parakeet feeding on winged termites. *Wilson Bulletin* 101: 656.
459. Scherer-Neto P, Straube F, Bornschein MR (1996). Avifauna e conservacao dos campos cerrados no estado do Parana (Brasil). *Acta Biologica Leopoldensia* 18: 145.
460. Schneider A, Sick H (1962). Sobre a distribuição de algumas aves do sudeste do Brasil segundo a coleção do Museu Nacional. *Boletim do Museu Nacional* 239: 5-13.
461. Sclater PL, Hudson WH (1889) *Argentine Ornithologie: a descriptive catalogue of the birds of the Argentine Republic*. R.H. Porter: London.
462. Scott DA, Brooke ML (1985). The endangered avifauna of southeastern Brazil: a report of the BOU/WWF Expeditions of 1980/81 and 1981/82. In: *Conservation of Tropical Forest Birds* (Diamond, JM, Lovejoy, TE, ed.) pp. 115-139. International Council for Bird Preservation Technical Publication, no.4.
463. Seixas GHF, Mourao GM (2000). Assessment of restocking blue-fronted amazon (*Amazona aestiva*) in the Pantanal of Brazil. *Ararajuba* 8: 73-78.
464. Seixas GHF, Mourao GM (2002). Nesting success and hatching survival of the blue-fronted amazon (*Amazona aestiva*) in the Pantanal of Mato Grosso do Sul, Brazil. *Journal of Field Ornithology* 73: 399-409.
465. Servat GP, Mendoza WC, Ochoa JA (2002). Flora y fauna de cuatro bosques de *Polylepis* (Rosaceae) en la cordillera del Vilcanota (Cusco, Peru). *Ecología Aplicada* 1: 26-35.
466. Sharpe CJ, Ascanio-Echevarria D, Rodriguez GA (2001). Further range extensions and noteworthy observations for Venezuela birds. *Bulletin of the British Ornithologists' Club* 121: 50.
467. Short LL (1974). Nesting of southern Sonoran birds during the summer rainy season. *Condor* 76: 21-32.
468. Sick H (1958). Resultados de uma excursão do Museu Nacional a Brasília, Novo Distrito Federal, Goiás, com a descrição de um novo representante de *Scytalopus* (Rhinocryptidae, Aves). *Boletim do Museu Nacional* 185: 5-25.
469. Sick H, Teixeira AM (1983). The discovery of the home of the Indigo Macaw *Anodorhynchus leari*, Bonaparte 1856. *Hornero No. Extraordinario*: 109-112.
470. Sick H, Teixeira DM (1980). Discovery of the home of the indigo macaw in Brazil with notes on field identification of 'blue' macaws. *American Birds* 34: 118-119.
471. Silva F (1981). Contribuicao ao conhecimento da biologia do papagaio charao, *Amazona pretrei* (Temminck, 1830) (Psittacidae, Aves). *Iheringia Serie Zoologia* 58.
472. Silva JMC, Oniki Y (1988). Lista preliminar da avifauna da estação ecológica Serra das Araras, Mato Grosso, Brasil. *Boletim do Museu Paraense Emílio Goeldi, Nova Série Zoologia* 4: 123-133.
473. Silva JMC, Willis EO (1986). Notas sobre a distribuição de quatro espécies de aves da Amazônia brasileira. *Boletim do Museu Paraense Emílio Goeldi, Nova Série Zoologia* 2: 151-158.
474. Silva T (1989) A monograph of endangered parrots. Silvio Mattacchione & Co. 356pp.
475. Silva T (1993) A monograph of macaws and conures. Silvio Mattacchione & Co. 490pp.
476. Silveira LF (1998). The birds of Serra da Canastra National Park and adjacent areas, Minas Gerais, Brazil. *Cotinga* 10: 55-63.
477. Silveira LF, Develey PF, Pacheco JF, Whitney BM (2005b). Avifauna of the Serra das Lontras-Javi montane complex, Bahia, Brazil. *Cotinga* 24: 45-54.
478. Silveira LF, d'Horta FM (2002). A avifauna da região de Vila Bela da Santíssima Trindade, Mato Grosso. *Papéis Avulsos de Zoologia* 42: 265-286.
479. Silveira LF, Olmos F, Long AJ (2003). Birds in Atlantic forest fragments in north-east Brazil. *Cotinga* 20: 32-46.
480. Silveira LF, Thadeo de Lima FC, Hofling E (2005). A new species of *Aratinga* parakeet (Psittaciformes: Psittacidae) from Brazil, with taxonomic remarks on the *Aratinga solstitialis* complex. *Auk* 122: 292-305.
481. Simao I, Santos FAM, Pizo MA (1997). Vertical stratification and diet of psittacids in a tropical lowland forest of Brazil. *Ararajuba* 5: 169-174.
482. Slud P (1960). The birds of finca "La Selva", Costa Rica: a tropical wet forest locality. *Bulletin of the American Museum of Natural History* 121: 49-148.

483. Slud P (1964). The birds of Costa Rica. Distribution and Ecology. Bulletin of the American Museum of Natural History 128: 1-430.
484. Slud P (1980). The birds of Hacienda Palo Verde, Guanacaste, Costa Rica. Smithsonian Contributions to Zoology 22: 1-92.
485. Smith AL, Ortiz JS, Robertson RJ (2001). Distribution patterns of migrant and resident birds in successional forests of the Yucatan Peninsula, Mexico. Biotropica 33: 153-170.
486. Snethlage E (1914). Catálogo das Aves Amazônicas (contendo todas as espécies mencionadas até 1913). Boletim do Museu Paraense Emílio Goeldi 8: 1-465.
487. Snyder DE (1966) The birds of Guyana (a checklist of 720 species). Peabody Museum: Salem.
488. Snyder N, McGowan P, Gilardi JD, Grajal A (2000) Parrots. Status survey and conservation action plan 2000-2004. IUCN, Cambridge University Press: Cambridge.
489. Snyder NFR, Wiley JW, Kepler CB (1987) The parrots of Luquillo: natural history and conservation of the Puerto Rican parrot. Western Foundation of Vertebrate Zoology: California.
490. Soares AG (2004). A avifauna de uma área no bairro de Ribeirão da Ilha, Florianópolis, Santa Catarina: levantamento e implicações para a educação ambiental. Biotemas 17: 107-124.
491. Souza FL (1995). Avifauna da cidade de Ribeirão Preto, estado de São Paulo. Biotemas 8: 100-109.
492. Stiles FG, Bohorquez CI (2000). Evaluando el estado de la biodiversidad: el caso de la avifauna de la Serranía de las Quinchas, Boyacá, Colombia. [Evaluation of biodiversity status: the case of the avifauna of Serranía de las Quinchas, Boyacá, Colombia.]. Caldasia 22: 61-92.
493. Stiles HFG (1991). La avifauna de la Universidad de Costa Rica y sus alrededores a través de veinte años (1968-1989). Revista de Biología Tropical 38: 361-381.
494. Stone WB (1928). On a collection of birds from the Para region, Brazil. Proceedings of the Academy of Natural Sciences of Philadelphia 80: 149-176.
495. Stone WB, Roberts HR (1934). Zoological results of the Matto Grosso expedition to Brazil in 1931. Birds. Proceedings of the Academy of Natural Sciences of Philadelphia 96: 363-397.
496. Stotz DF, Lanyon SC, Schulenberg TS, Willard DE, Peterson AT, Fitzpatrick JW (1997). An avifaunal survey of two tropical localities on the middle Rio Jiparana, Rondônia, Brazil. Ornithological Monographs 48: 763-781.
497. Strahl SD, Desenne PA, Jimenez JL, Goldstein IR (1991). Behavior and biology of the hawk-headed parrot, *Deroptyus accipitrinus*, in southern Venezuela. Condor 93: 177-180.
498. Straube F (1988). Contribuições ao conhecimento da Avifauna da região sudoeste do Estado do Paraná (Brasil). Biotemas 1: 63-75.
499. Straube F (2003). Avifauna da área especial de interesse turístico do Marumbi (Paraná, Brasil). Atualidades Ornitológicas 113: 12.
500. Straube F, Bornschein MR (1995). New or noteworthy records of birds from northwestern Paraná and adjacent areas. Bulletin of the British Ornithologists' Club 115: 219.
501. Straube F, Urben-Filho A (2004). Uma revisão crítica sobre o grau de conhecimento da avifauna do Parque Nacional do Iguaçu (Paraná, Brasil) e áreas adjacentes. Atualidades Ornitológicas 118: 6.
502. Straube F, Urben-Filho A (2005). Avifauna da reserva natural Salto Morato (Guaraquecaba, Paraná). Atualidades Ornitológicas 124: 12.
503. Straube F, Urben-Filho A, Gatto C (2005). A avifauna do Parque Estadual do Cerrado (Jaguariaíva, Paraná) e a conservação do cerrado em seu limite meridional de ocorrência. Atualidades Ornitológicas 127: 29.
504. Straube FC, Urben-Filho A, Candido-Jr. JR (2004). Novas informações sobre a avifauna do Parque Nacional do Iguaçu (Paraná). Atualidades Ornitológicas 120: 10-27.
505. Straube FC, Willis EO, Oniki Y (2002). Aves colecionadas na localidade de Fazenda Caiua (Paraná, Brasil) por Adolph Hempel, com discussão sobre a sua localização exata. Ararajuba 10: 167-172.
506. Strewé R, Navarro CI (2003). New distributional records and conservation importance of the San Salvador Valley, Sierra Nevada de Santa Marta, northern Colombia. Ornithologia Colombiana 1: 29-41.
507. Teixeira DM, Nacinovic JB, Tavares MS (1986). Notes of some birds of northeastern Brazil. Bulletin of the British Ornithologists' Club 106: 71.
508. Terborgh J, Fitzpatrick JW, Emmons L (1984). Annotated checklist of bird and mammal species of Cocha Cashu Biological Station, Manu National Park, Peru. Fieldiana, Zoology 21: 1-29.
509. Tobias JA, Seddon N (2002). First nest record of scarlet-shouldered parrotlet *Touit huetii*. Cotinga 18: 104.
510. Torrano FJ (1990). *Aratinga leucophthalma* en Concordia, Entre Ríos. Nuestras Aves 22.
511. Torres JMS (2001). Registro de guacamaya verde (*Ara militaris*) en los canones del Río Sabino y Río Seco, Santa María Tecomanavaca, Oaxaca, México. Huitzil 2: 18-20.
512. Toyne EP, Flanagan JNM (1996). First nest record of Red-faced Parrot *Hapalopsittaca pyrrhops*. Cotinga 5: 43.
513. Toyne EP, Flanagan JNM (1997). Observations on the breeding, diet and behaviour of the red-faced parrot *Hapalopsittaca pyrrhops* in southern Ecuador. Bulletin of the British Ornithologists' Club 117: 257-263.
514. Toyne EP, Flanagan JNM, Jeffcote MT (1995). Vocalizations of the endangered Red-faced Parrot *Hapalopsittaca pyrrhops* in southern Ecuador. Ornithologia Neotropical 6: 125.



515. Toyne EP, Jeffcote MT (1994). Nesting records of Pionus species in southern Ecuador. Bulletin of the British Ornithologists' Club 114: 124-127.
516. Traylor MA (1958). Birds of north-eastern Peru. Fieldiana Zoology 35: 87-141.
517. Trolle M, Walther BA (2004). Preliminary bird observations in the rio Jauaperí region, rio Negro basin, Amazonia, Brazil. Cotinga 22: 81-85.
518. Troncoso FP, van der Wolf PAJ, Ahumada JA (1995). The lilac-tailed parrotlet (Touit batavica), a new record for Colombia. Caldasia 18: 147-148.
519. Tubelis DP, Cavalcanti RB (2001). Community similarity and abundance of bird species in open habitats of a central Brazilian cerrado. Ornitologia Neotropical 12: 57-73.
520. Tubelis DP, Tomas WM (2003). Bird species of the Pantanal Wetland, Brazil. Ararajuba 11: 5-37.
521. Urbina-Torres F (2000). New distributional information of birds from the state of Morelos, Mexico. Bulletin of the British Ornithologists' Club 120: 8.
522. Vallely AC, Whitman AA (1999). The birds of Hillbank, northern Belize. Cotinga 8: 39-43.
523. van den Berg AB, Bosman CAW (1984). Range extensions and rare records of birds in Ecuador. Bulletin of the British Ornithologists' Club 104: 152-154.
524. van Tyne JV (1935). The birds of northern Petén, Guatemala. Occasional Papers of the Museum of Zoology of the University of Michigan 27: 1-46.
525. Varty N (1993). Ecology and conservation of *Amazona pretrei* and *Amazona vinacea* in southern Brazil. Amazona 12: 22-29.
526. Vasconcelos MF (1998). Registros de duas espécies de aves ameaçadas de extinção em unidades de conservação do Estado de Minas Gerais: *Amazona vinacea* e *Pyroderus scutatus*. Atualidades Ornitológicas 86: 6.
527. Vasconcelos MF, Melo-Junior TA (2001). An ornithological survey of Serra do Caraça, Minas Gerais, Brazil. Cotinga 15: 21-31.
528. Vaughan C, Nemeth N, Marineros L (2003). Ecology and management of natural and artificial scarlet macaw (*Ara macao*) nest cavities in Costa Rica. Ornitologia Neotropical 14: 381-396.
529. Velez JHE, Walker RH (1999). Inventario preliminar de la avifauna del Paramo de Miraflores, Gigante (Huila), observada en una trocha vertical entre los 2500 a 3000 m.s.n.m. Boletín Científico Museo de Historia Natural Universidad de Caldas 3: 23-27.
530. Vellinga WP, Flanagan JN, Mark TR (2004). New and interesting records of birds from Ayabaca province, Piura, north-west Peru. Bulletin of the British Ornithologists' Club 124: 134.
531. Venturini AC, Rehen MA, Paz PR, Carmo LP (2000). Contribuição ao conhecimento de aves da região centro-serrana do Espírito Santo: municípios de Santa Maria do Jetibá e Itarana. Atualidades Ornitológicas 98: 11-12.
532. Vereza C, Solorzano A (1998). La avifauna del sotobosque de una selva decidua tropical en Venezuela. Ornitologia Neotropical 9: 161-176.
533. Verhelst JC, Pfeifer AM, Orrego O, Botero JE (2002). Observaciones sobre la ecología del Periquito Frentirrufo *Bolborhynchus ferrugineifrons* en zonas cercanas a la Laguna del Otún. Cotinga 18: 66-70.
534. von Ihering H (1899) As aves do Estado do Rio Grande do Sul. Gundlach & Krahe: Porto Alegre.
535. Voous KH (1957). The birds of Aruba, Curaçao and Bonaire. In: Studies on the fauna of Curaçao and other caribbean islands. (Hammenlinck, PW, ed.). Martinus Nijhoff.
536. Walker RH (1996). Avifauna registrada en la parte alta de la microcuenca Palogrande (sector del jardín botánico de la Universidad de Caldas). Boletín Científico Museo de Historia Natural Universidad de Caldas 1: 11-15.
537. Wanker R, Cruz BL, Franck D (1996). Socialization of spectacled parrotlets *Forpus conspicillatus*: The role of parents, creches and sibling groups in nature. Journal fuer Ornithologie 137: 447-461.
538. Wermundsen T (1999). Seasonal and diurnal variation in Pacific parakeet *Aratinga strenua* flock sizes in Nicaragua. Ardeola 46: 39-43.
539. Wetmore A (1916). Birds of Porto Rico. US Department of Agriculture Bulletin 326.
540. Wetmore A (1926) Observations on the birds of Argentina, Uruguay, Paraguay and Chile. Government Printing Office: Washington.
541. Wetmore A (1927). Scientific survey of Porto Rico and the Virgin Islands. New York Academy of Sciences 9: 243-572.
542. Wetmore A (1939). Observations on the birds of northern Venezuela. Proceedings of the US National Museum 87: 173-260.
543. Wetmore A (1941). Notes on birds of the Guatemalan highlands. Proceedings of the US National Museum 89: 523-581.
544. Wetmore A (1944). A collection of birds from northern Guanacaste, Costa Rica. Proceedings of the US National Museum 95: 25-80.
545. Wetmore A (1957). The birds of Isla Coiba, Panamá. Smithsonian Miscellaneous Collection 134: 1-105.
546. Wetmore A (1968). The birds of the Republic of Panama. Part 2 Columbidae to Picidae. Smithsonian Miscellaneous Collection 150: 1-605.
547. Wetmore A, Swales BH (1931). The birds of Haiti and the Dominican Republic. Bulletin of the United States National Museum 155: 1-483.

548. Whitney BM, Rowlett JL, Rowlett RA (1994). Distribution and other noteworthy records for some Bolivian birds. *Bulletin of the British Ornithologists' Club* 114: 149.
549. Whittaker A (2004). Noteworthy ornithological records from Rondonia, Brazil, including a first country record, comments on austral migration, life-history, taxonomy and distribution, with relevant data from neighbouring states, and a first record for Bolivia. *Bulletin of the British Ornithologists' Club* 124: 239.
550. Whittaker A, Oren DC (1999). Important ornithological records from Rio Juruá, western Amazonia, including twelve additions to the Brazilian avifauna. *Bulletin of the British Ornithologists' Club* 219: 235-260.
551. Whittingham MJ, Brown AF, Drewitt A, Rees S (1998). Finding hyacinth macaw *Anodorhynchus hyacinthinus* in the Pantanal, Mato Grosso, Brazil. *Cotinga* 10: 66-67.
552. Wiedenfeld DA (1994). A new subspecies of scarlet macaw and its status and conservation. *Ornitologia Neotropical* 5: 99-104.
553. Wiedenfeld DA, Morales JM, Lezama M (2001). Sight records of new species for Nicaragua and noteworthy records on range and occurrence. *Cotinga* 15: 53-57.
554. Wiedenfeld DA, Schuler TS, Robbins MB (1985). Birds of a tropical deciduous forest in extreme northwestern Peru. *Ornithological Monographs* 35: 305.
555. Wiley JW (1981). The Puerto Rican parrot: (*Amazona vittata*) its decline and the program for its conservation. In: *Conservation of New World Parrots. Proceedings of the ICBP Parrot Working Group, St. Lucia, 1980.* (Pasquier, RF, ed.) pp. 133. Smithsonian Institution Press: Washington.
556. Wiley JW (1993). Natural range expansion and local extirpation of an exotic psittacine - an unsuccessful colonization attempt. *Ornitologia Neotropical* 4: 43.
557. Wiley JW, Gnam RS, Koenig SE, Dornelly A, Galvez X, Bradley PE, White T, Zamore M, Reillo PR, Anthony D (2004). Status and conservation of the family Psittacidae in the West Indies. *Journal of Caribbean Ornithology* 17: 94-154.
558. Willard DE, Foster MS, Barrowclough GF, Dickerman RW, Cannel PF, Coats SL, Cracraft J, O'Neil JP (1991). The birds of Cerro de la Neblina, Territorio Federal Amazonas, Venezuela. *Fieldiana, Zoology* 65: 1.
559. Willis EO (1977). Lista preliminar das aves da parte noroeste e áreas vizinhas da Reserva Ducke, Amazonas, Brasil. *Revista Brasileira de Biologia* 37: 585-601.
560. Willis EO (1981). Levantamento preliminar de aves em treze áreas do Estado de São Paulo. *Revista Brasileira de Biologia* 41: 121-135.
561. Willis EO (2002). Birds at Eucalyptus and other flowers in Southern Brazil: a review. *Ararajuba* 10: 43-66.
562. Willis EO, Oniki Y (1991). Avifaunal transects across the open zones of northern Minas Gerais, Brazil. *Ararajuba* 2: 41-58.
563. Willis EO, Oniki Y (1993). New and reconfirmed birds from the state of São Paulo, Brazil, with notes on disappearing species. *Bulletin of the British Ornithologists' Club* 113: 23.
564. Willis EO, Oniki Y (2002a). Birds of Santa Tereza, Espírito Santo, Brazil: do humans add or subtract species? *Papéis Avulsos de Zoologia* 42: 193-264.
565. Willis EO, Oniki Y (2002b). Birds of a central São Paulo woodlot: 1. Censuses 1982-2000. *Brazilian Journal of Biology* 62: 197-210.
566. Wilson KA, Field R, Wilson MH (1995). Successful nesting behavior of Puerto Rican Parrots. *Wilson Bulletin* 107: 518.
567. Yamashita C, Barros YM (1997). The blue-throated macaw *Ara glaucogularis*: characterization of its distinctive habitats in savannahs of the Beni, Bolivia. *Ararajuba* 5: 141-150.
568. Yamashita C, Franca JT (1991). A range extension of the golden parakeet *Aratinga guarouba* to Rondonia state, western Amazonia (Psittaciformes: Psittacidae). *Ararajuba* 2: 91-92.
569. Young BE, DeRosier D, Powell GVN (1998). Diversity and conservation of understory birds in the Tilaran Mountains, Costa Rica. *Auk* 115: 998.
570. Zimmer KJ, Hilty SL (1997). Avifauna of a locality in the Upper Orinoco Drainage of Amazonas, Venezuela. *Ornithological Monographs* 48: 865-885.
571. Zimmer KJ, Parker III TA, Isler ML, Isler PR (1997). Survey of a southern Amazonian avifauna: the Alta Floresta region, Mato Grosso, Brazil. *Ornithological Monographs* 48: 887-918.
572. Zimmermann CE (1995). Novas informacoes sobre a avifauna do parque ecologico Artex. *Biotemas* 8: 7-20.
573. Zota AR (1949). Dos nuevas aves para el Paraguay y una para el Uruguay. *Hornero* 9: 166.
574. Zyskowski K, Robbins BM, Peterson AT, Bostwick KS, Clay RP, Amarilla LA (2003). Avifauna of the northern Paraguayan chaco. *Ornitologia Neotropical* 14: 247-262.

**(B) Museum collections**

| <b>Institution</b>                                    | <b>Country</b> | <b>Curator/Collection Manager</b> |
|-------------------------------------------------------|----------------|-----------------------------------|
| 1. Academy of Natural Sciences                        | USA            | N. Rice                           |
| 2. Australian Museum                                  | Australia      | W. Boles                          |
| 3. Australian National Wildlife Collection            | Australia      | T. Chesser                        |
| 4. Berkeley Museum of Vertebrate Zoology              | USA            | Database available online         |
| 5. California Academy of Sciences                     | USA            | D. J. Long                        |
| 6. University Museum of Zoology, Cambridge            | England        | R. Symonds                        |
| 7. Canadian Museum of Nature                          | Canada         | M. Gosselin                       |
| 8. Carnegie Museum of Natural History                 | USA            | S. P. Rogers                      |
| 9. Cornell University Museum of Vertebrates           | USA            | K. Bostwick                       |
| 10. Delaware Museum of Natural History                | USA            | J. Woods                          |
| 11. Field Museum of Natural History                   | USA            | Database available online         |
| 12. Florida Museum of Natural History                 | USA            | T. Webber                         |
| 13. Instituto Miguel Lillo                            | Argentina      | A. Echevarría                     |
| 14. Moore Laboratory of Zoology                       | USA            | E. Reddington                     |
| 15. Museo de la Plata                                 | Argentina      | C. Darrieu                        |
| 16. Museo de las Aves de México                       | Mexico         | A. G. León, R. Tinajero           |
| 17. Museo Nacional de Costa Rica                      | Costa Rica     | G. Alvarado                       |
| 18. Museo Nacional de Historia Natural de Cuba        | Cuba           | A. Kirkconnell Pérez              |
| 19. Museo Nacional de Historia Natural y Antropología | Uruguay        | J. Cuello                         |
| 20. Museu de Zoologia da Universidade de São Paulo    | Brazil         | L.F. Silveira                     |
| 21. Museu de Zoologia da Universidade de Campinas     | Brazil         | Database available online         |
| 22. Museu Paraense Emílio Goeldi                      | Brazil         | A. Aleixo, M.L. Videira           |
| 23. Muséum d'Histoire Naturelle de la Ville de Genève | Switzerland    | C. Benier, A. Cibois              |
| 24. Muséum National d'Histoire Naturelle              | France         | R. Bruckert                       |
| 25. Museum of Comparative Zoology of Harvard          | USA            | Database available online         |
| 26. Museum of Zoology of Michigan University          | USA            | J. Hinshaw                        |
| 27. Natural History Museum of Kansas University       | USA            | M. Robbins                        |
| 28. Natural History Museum Bern                       | Switzerland    | M. Guntert                        |
| 29. Oxford Museum of Natural History                  | England        | M. Nowak-Kemp, S. Phibbs          |
| 30. Sam Noble Oklahoma Museum                         | USA            | G. Schnell, A.C. Person           |
| 31. Smithsonian Museum of Natural History             | USA            | O. Orson, J. Dean, C. Ludwig      |
| 32. Transvaal Museum                                  | South Africa   | T. Cassidy, M. Burger             |
| 33. Western Foundation of Vertebrate Zoology          | Canada         | R. Corrado                        |
